# Supplementary material for: Novel organo-osmium(ii) proteosynthesis inhibitors active against human ovarian cancer cells reduce gonad tumor growth inCaenorhabditis elegans
Source: Royal Society of Chemistry journal article supplement (doi:10.1039/c9qi01704f), 2020-10-27
Supplement: c9qi01704f1.pdf [file c9qi01704f1.pdf]

## Electronic Supplementary Information

### **Novel organo-osmium(II) proteosynthesis inhibitors active against human ovarian cancer cells reduces gonad tumor growth in *Caenorhabditis elegans***

Enrique Ortega,<sup>a,†</sup> Francisco J. Ballester,<sup>a,†</sup> Alba Hernández-García,<sup>a</sup> Samanta Hernández-García,<sup>b</sup> M. Alejandra Guerrero-Rubio,<sup>b</sup> Delia Bautista,<sup>c</sup> M. Dolores Santana<sup>a,\*</sup> Fernando Gandía-Herrero,<sup>b,\*</sup> and José Ruiz<sup>a,\*</sup>

<sup>a</sup> *Departamento de Química Inorgánica, Universidad de Murcia, and Institute for Bio-Health Research of Murcia (IMIB-Arrixaca), E-30071 Murcia, Spain.*

<sup>b</sup> *Departamento de Bioquímica y Biología Molecular A, Unidad Docente de Biología, Facultad de Veterinaria, Universidad de Murcia, E-30071 Murcia, Spain.*

<sup>c</sup> *SAI, Universidad de Murcia, E-30071 Murcia, Spain.*

Email: [jruiz@um.es](mailto:jruiz@um.es); [fgandia@um.es](mailto:fgandia@um.es); [dsl@um.es](mailto:dsl@um.es).

<sup>†</sup> These authors contributed equally to this work.

## **Table of Contents**

|                                                                             |    |
|-----------------------------------------------------------------------------|----|
| 1. Instrumentation.....                                                     | 3  |
| 2. Reagent and solvents.....                                                | 3  |
| 3. Schemes of synthesis.....                                                | 4  |
| 4. NMR spectra of compounds 1a-5a.....                                      | 5  |
| Compound 1a.....                                                            | 5  |
| Compound 2a.....                                                            | 8  |
| Compound 3a.....                                                            | 11 |
| Compound 4a.....                                                            | 15 |
| Compound 5a.....                                                            | 18 |
| 5. Absorption and emission spectra of complexes 1a-5a.....                  | 22 |
| 6. UV-VIS stability study of compounds 1a and 2a.....                       | 24 |
| 7. HPLC-MS stability studies of compounds 3a-5a.....                        | 25 |
| Complex 3a.....                                                             | 26 |
| Complex 4a.....                                                             | 27 |
| Complex 5a.....                                                             | 28 |
| 8. Hydrolysis of complex 3a.....                                            | 29 |
| 9. X-Ray structures of compounds 3a-5a.....                                 | 31 |
| 10. Morphological analysis of A2780 cells.....                              | 35 |
| 11. Measurement of the mitochondrial membrane potential.....                | 36 |
| 12. Cell death induction assays.....                                        | 36 |
| 13. Cell cycle analysis.....                                                | 37 |
| 14. Protein synthesis inhibition assay.....                                 | 39 |
| 15. ROS generation.....                                                     | 40 |
| 16. Tumor size evaluation.....                                              | 40 |
| 17. Survival assays.....                                                    | 44 |
| 18. Effect of the metallic complexes in ROS production <i>in vivo</i> ..... | 47 |
| 19. Effect of 4a, 4b and CDDP on HSP-16.2p expression.....                  | 49 |
| 20. Effect of 5a, 5b and CDDP on SOD-3 expression.....                      | 50 |
| 21. Effect of 4a, 4b and CDDP on GST-4p expression.....                     | 51 |
| 22. References.....                                                         | 53 |

## 1. Instrumentation

The  $^1\text{H}$  and  $^{13}\text{C}$  NMR spectra were recorded on Bruker AC 300E and Bruker AV 400. Chemical shifts are cited relative to the residual  $^1\text{H}$  and  $^{13}\text{C}$  solvent peaks. The complexes were analyzed via multinuclear 2D ( $^1\text{H}$ - $^1\text{H}$  COSY and  $^1\text{H}$ - $^{13}\text{C}$  HSQC) NMR spectroscopic experiments that allowed unambiguous assignments of all resonances. UV/vis spectroscopy was carried out on a PerkinElmer Lambda 750 S spectrometer with operating software. ESI mass (positive mode) analyses were performed on a HPLC/MS TOF 6220. The isotopic distribution of the heaviest set of peaks matched very closely that calculated for the formulation of the complex cation in every case. The FT-IR spectra were recorded on a Perkin-Elmer 1430 spectrophotometer using KBr disc. The C, H, N and S analyses were performed with a Carlo Erba model EA 1108 microanalyzer.

## 2. Reagent and solvents

All synthetic manipulations were carried out under an atmosphere of dry nitrogen using standard Schlenk techniques. Solvents were dried by the usual methods. Pyridine, 4-(dimethylamino)pyridine, 4-(2-pyridyl)benzaldehyde, 2-phenylpyridine ligands, sodium acetate, dimethyl sulfoxide (DMSO), osmium(III) chloride hydrate and CDDP were obtained from Sigma-Aldrich (Madrid, Spain).  $[(\eta^6\text{-}p\text{-cymene})\text{OsCl}_2]_2$  was prepared as previously reported. Deuterated solvents were obtained from Euriso-top.

For cellular studies, stock solutions were prepared by dissolving the compounds in DMSO to a final concentration of 20 mM and serially diluted prior to testing in DMSO. The final DMSO concentration in culture medium did not exceed 0.4 % (v/v) to avoid DMSO toxicity. CDDP stock solution was prepared by dissolving CDDP in ultrapure water (Milli-Q®, Merck Millipore) to a final concentration of 20 mM.

### 3. Schemes of synthesis

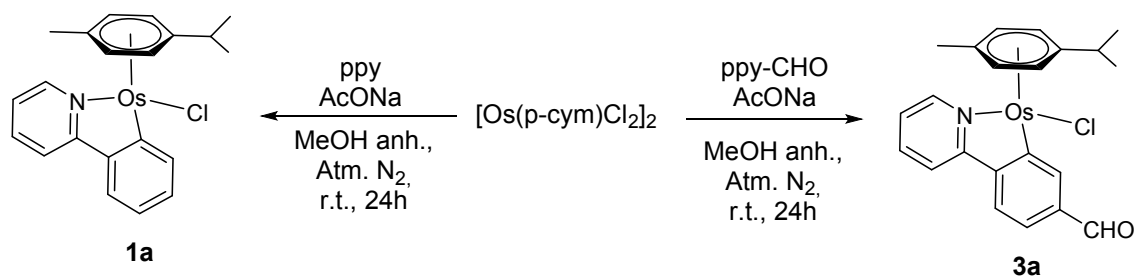

**Scheme S1.** Synthesis of complexes **1a** and **3a**.

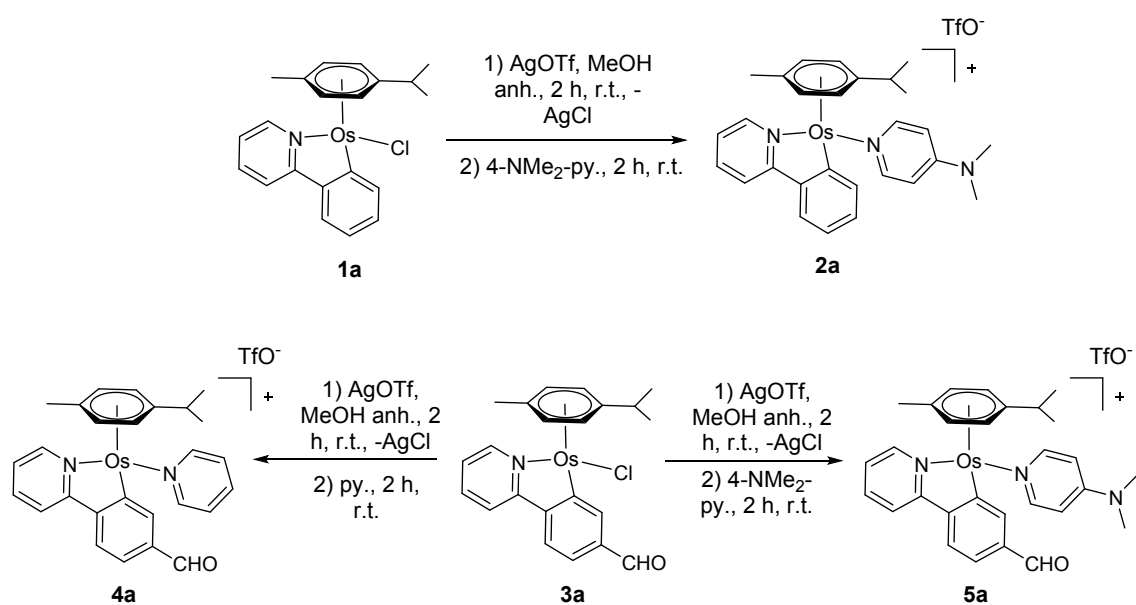

**Scheme S2.** Synthesis of complexes **2a**, **4a** and **5a**.

## 4. NMR spectra of compounds 1a-5a

### Compound 1a

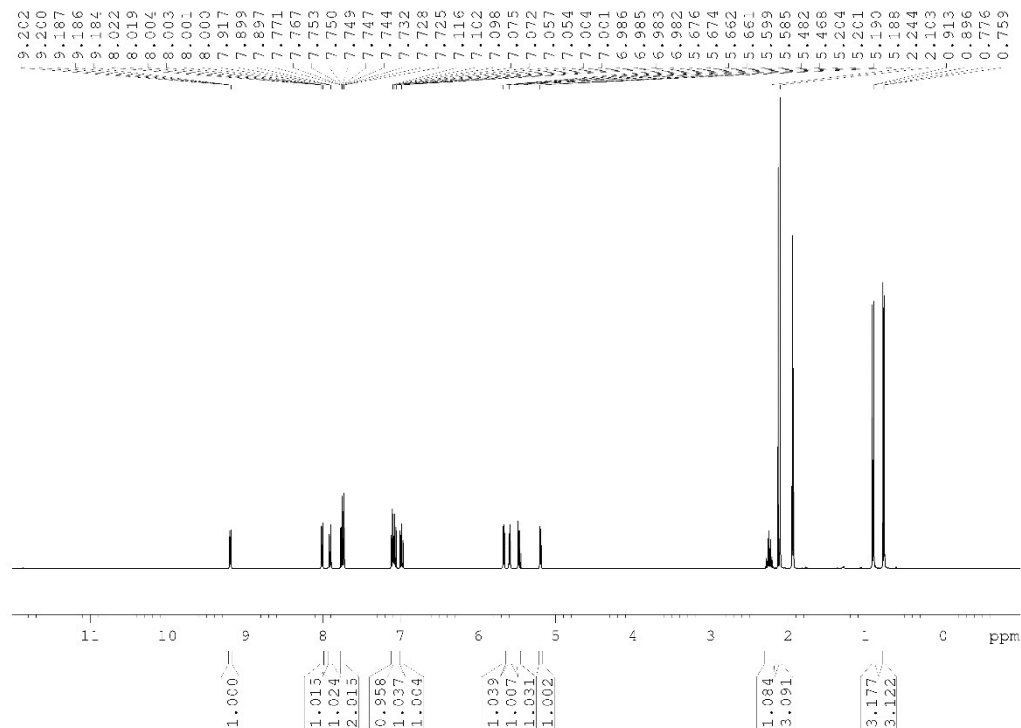

**Figure S1.** 400 MHz  $^1\text{H}$  NMR spectrum of complex **1a** in  $\text{CD}_3\text{CN}$ .

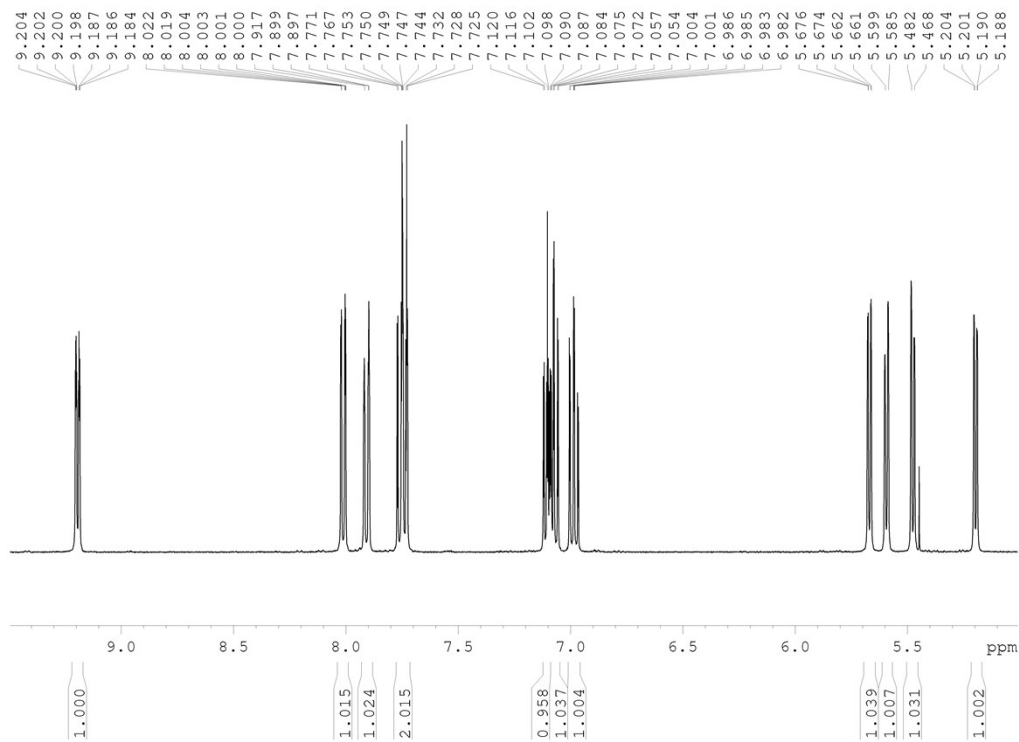

**Figure S2.** Aromatic region of  $^1\text{H}$  NMR spectrum of complex **1a** in  $\text{CD}_3\text{CN}$

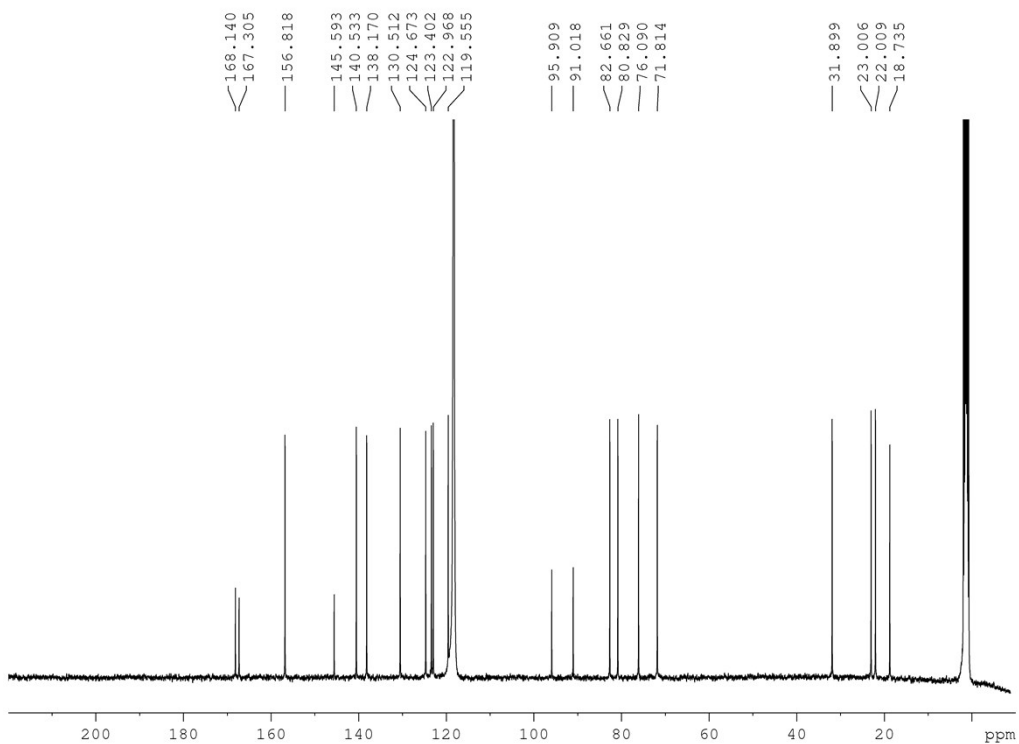

**Figure S3.** 101 MHz  $^{13}\text{C}$  NMR spectrum of complex **1a** in  $\text{CD}_3\text{CN}$

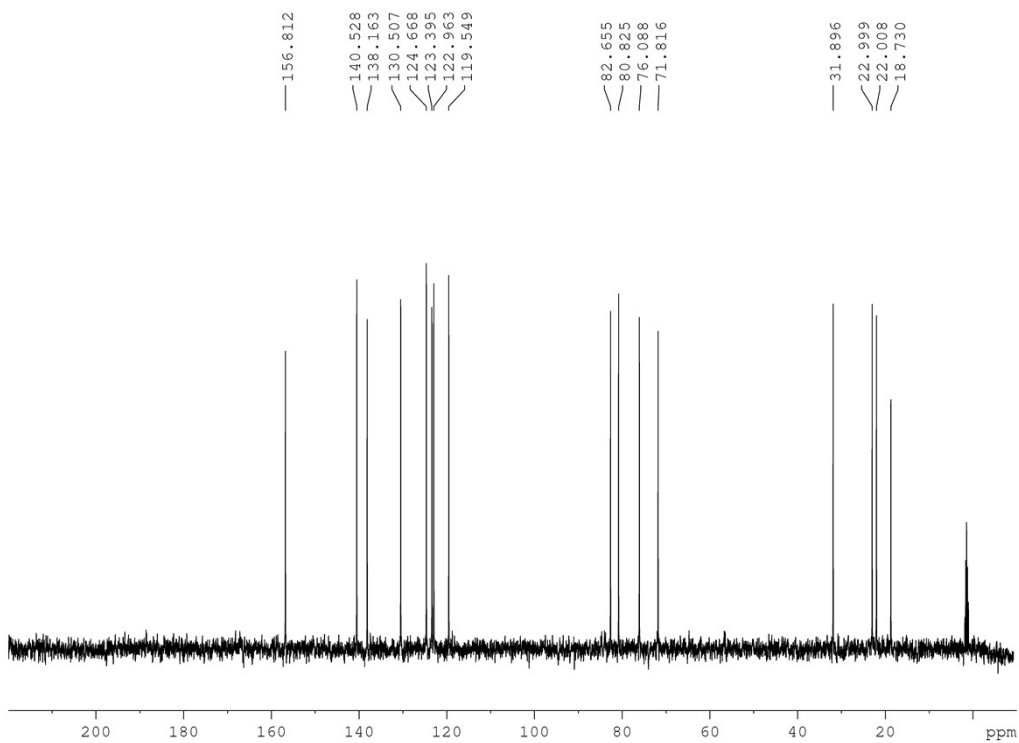

**Figure S4.** 101 MHz DEPT-135 NMR spectrum of complex **1a** in  $\text{CD}_3\text{CN}$ .

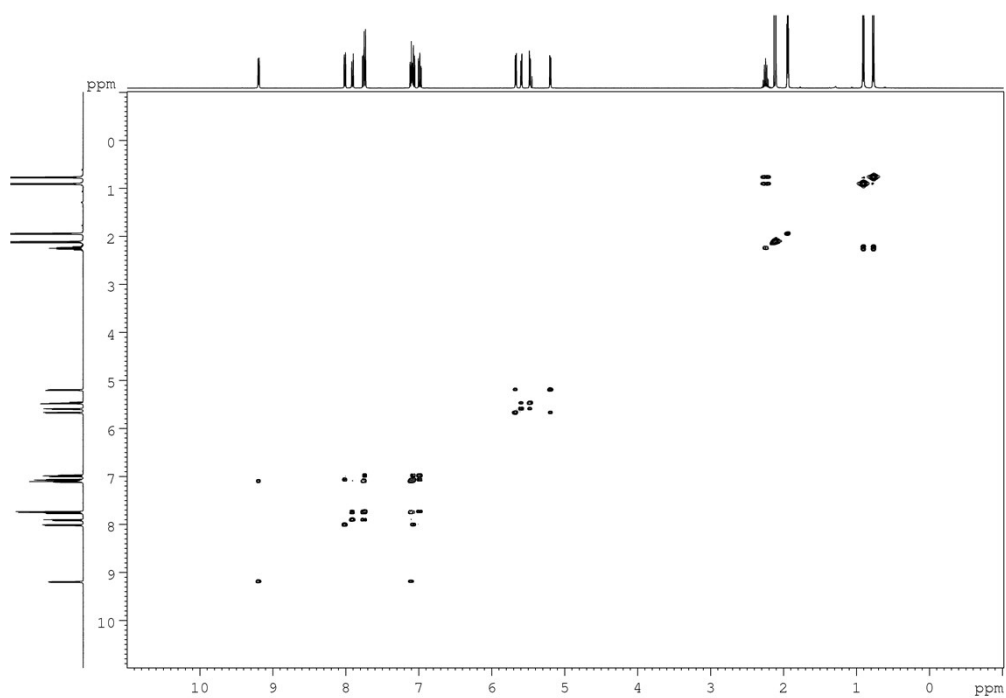

**Figure S5.** 400 MHz [ $^1\text{H}$ ,  $^1\text{H}$ ]-COSY NMR spectrum of complex **1a** in  $\text{CD}_3\text{CN}$

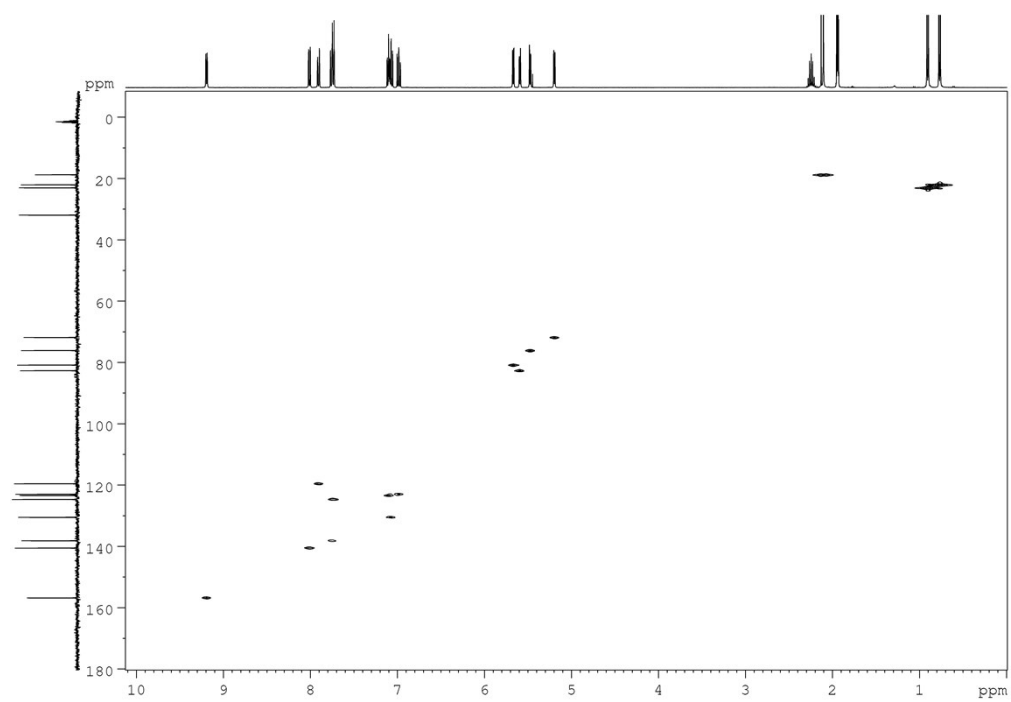

**Figure S6.** [ $^1\text{H}$ ,  $^{13}\text{C}$ ]-HMQC 2D NMR ( $^1\text{H}$ , 400 MHz) spectrum of complex **1a** in  $\text{CD}_3\text{CN}$

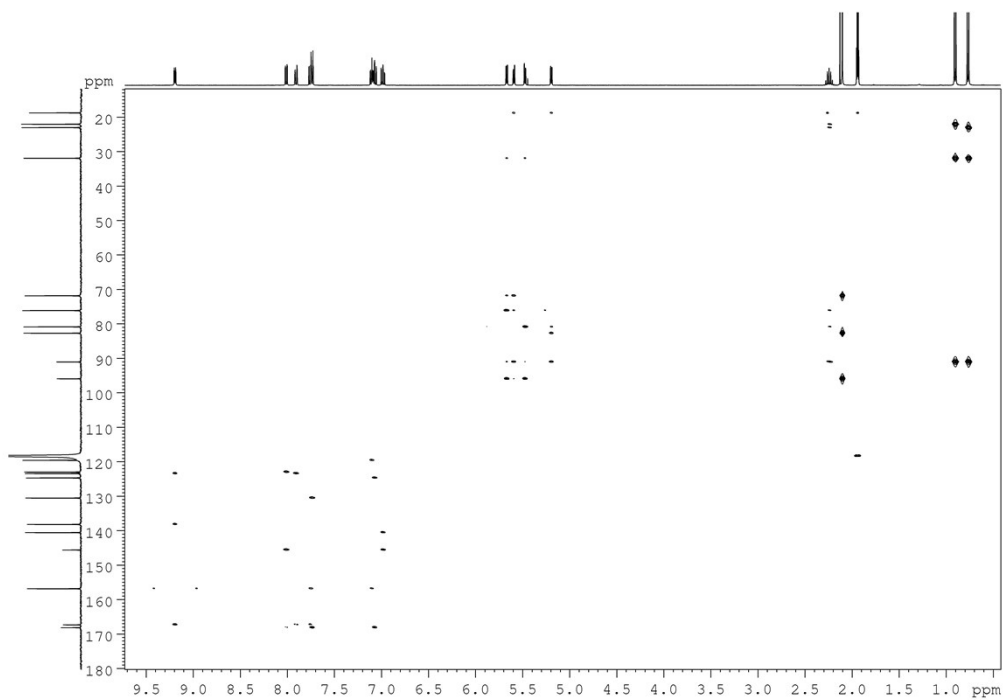

**Figure S7.** [ $^1\text{H}$ ,  $^{13}\text{C}$ ]-HMBC 2D NMR ( $^1\text{H}$ , 400 MHz) spectrum of complex **1a** in  $\text{CD}_3\text{CN}$

**Compound 2a**

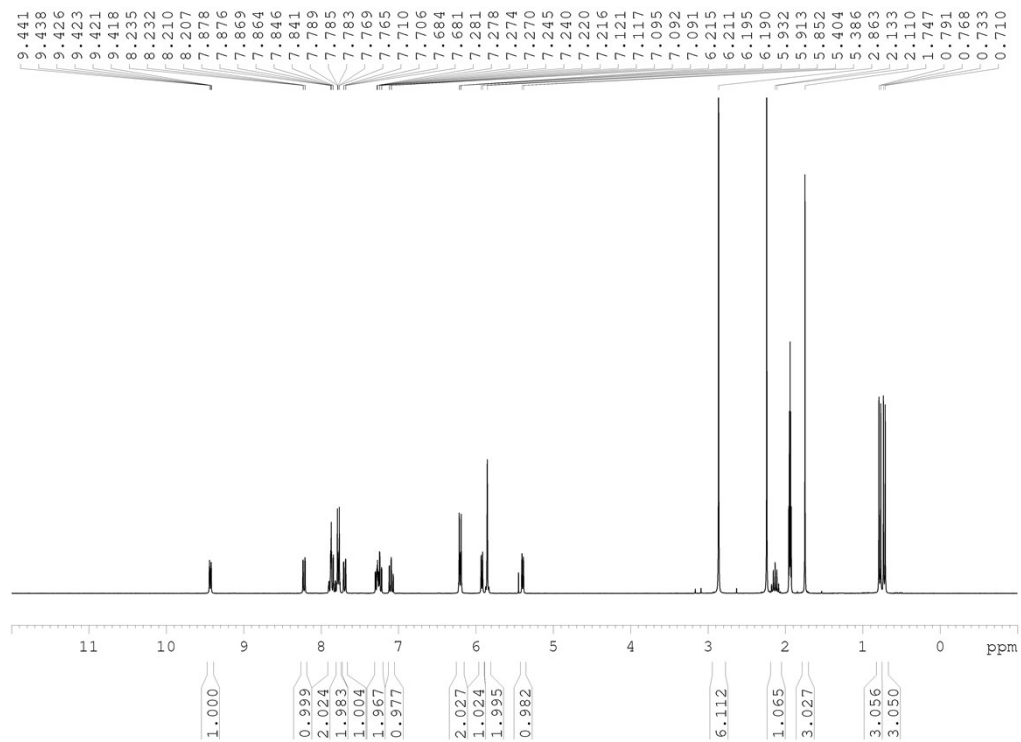

**Figure S8.** 300 MHz  $^1\text{H}$  NMR spectrum of complex **2a** in  $\text{CD}_3\text{CN}$



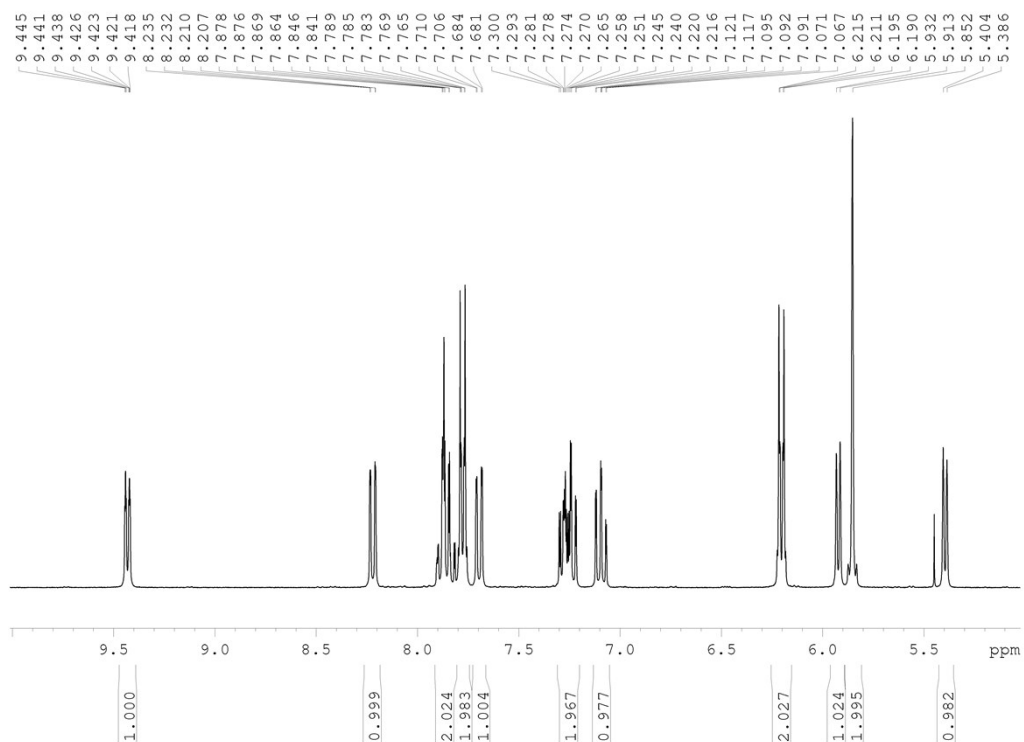

**Figure S9.** Aromatic region of  $^1\text{H}$  NMR spectrum of complex **2a** in  $\text{CD}_3\text{CN}$ .

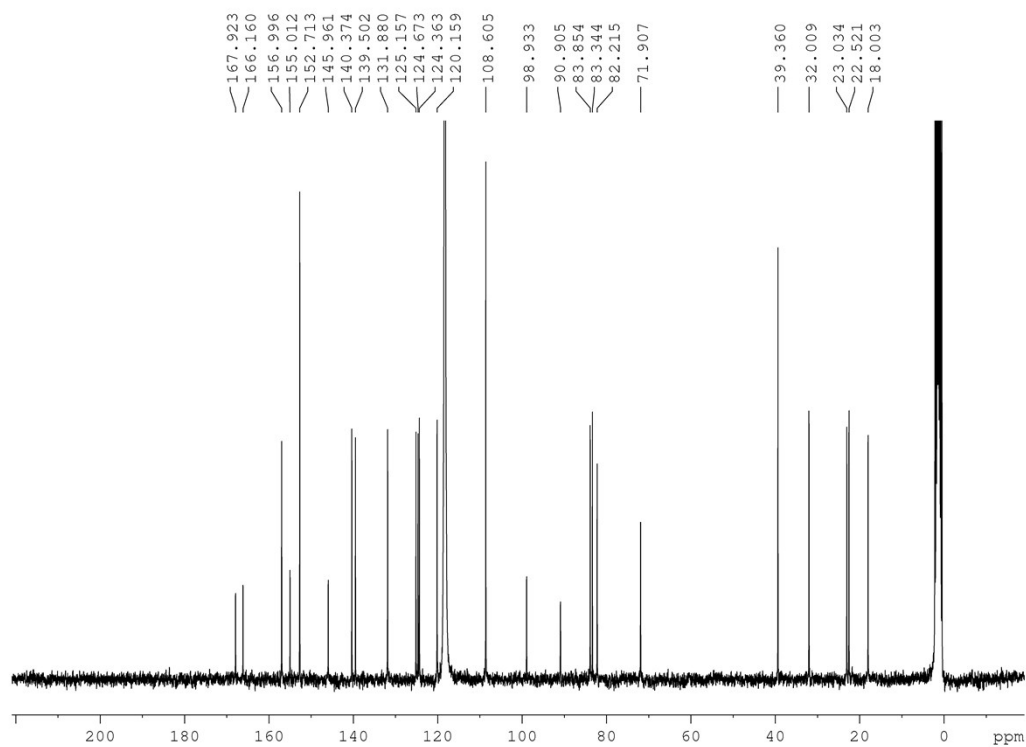

**Figure S10.** 75 MHz  $^{13}\text{C}$  NMR spectrum of complex **2a** in  $\text{CD}_3\text{CN}$ .

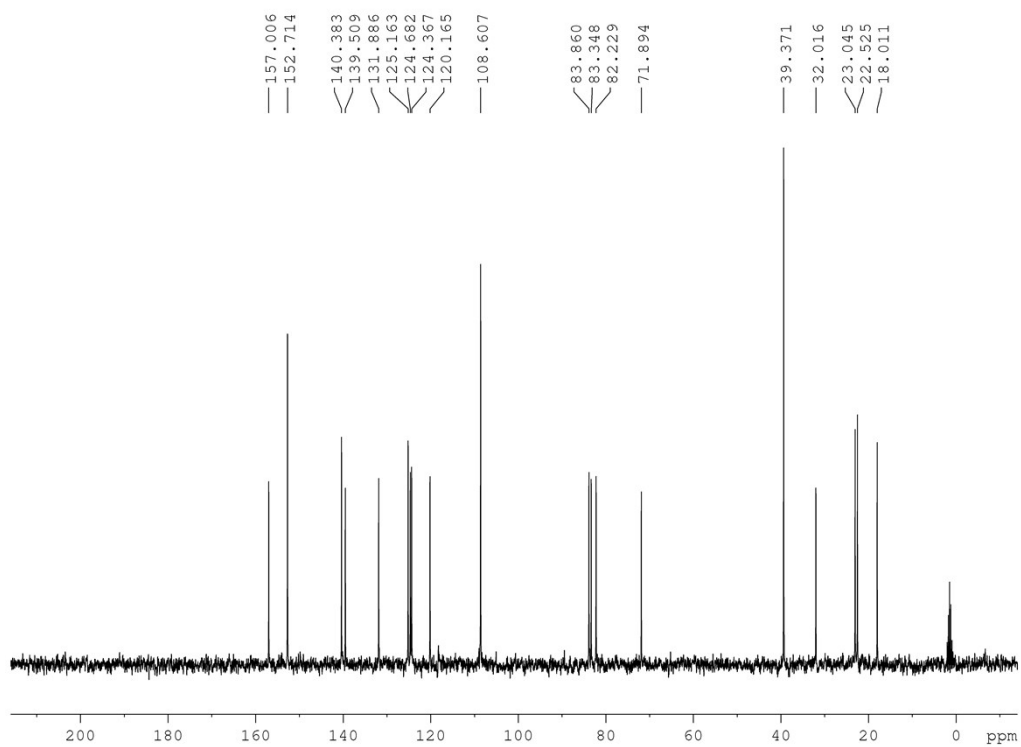

**Figure S11.** 75 MHz DEPT-135 NMR spectrum of complex **2a** in CD<sub>3</sub>CN.

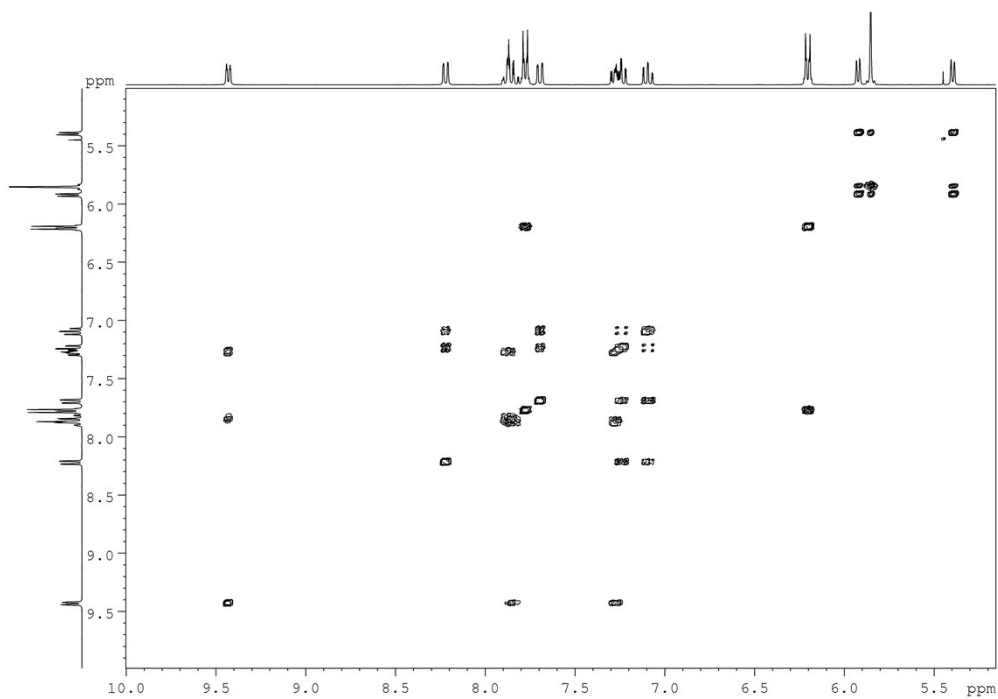

**Figure S12.** 300 MHz [<sup>1</sup>H, <sup>1</sup>H]-COSY NMR spectrum of complex **2a** in CD<sub>3</sub>CN.

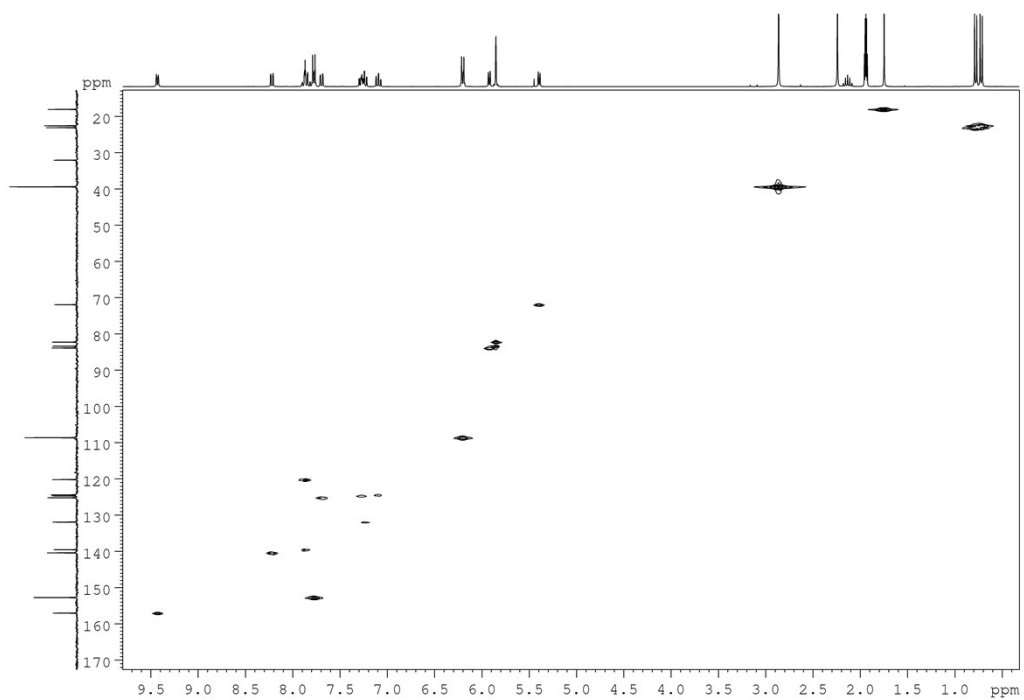

**Figure S13.** [ $^1\text{H}$ ,  $^{13}\text{C}$ ]-HSQC 2D NMR ( $^1\text{H}$ , 300 MHz) spectrum of complex **2a** in  $\text{CD}_3\text{CN}$ .

### Compound 3a

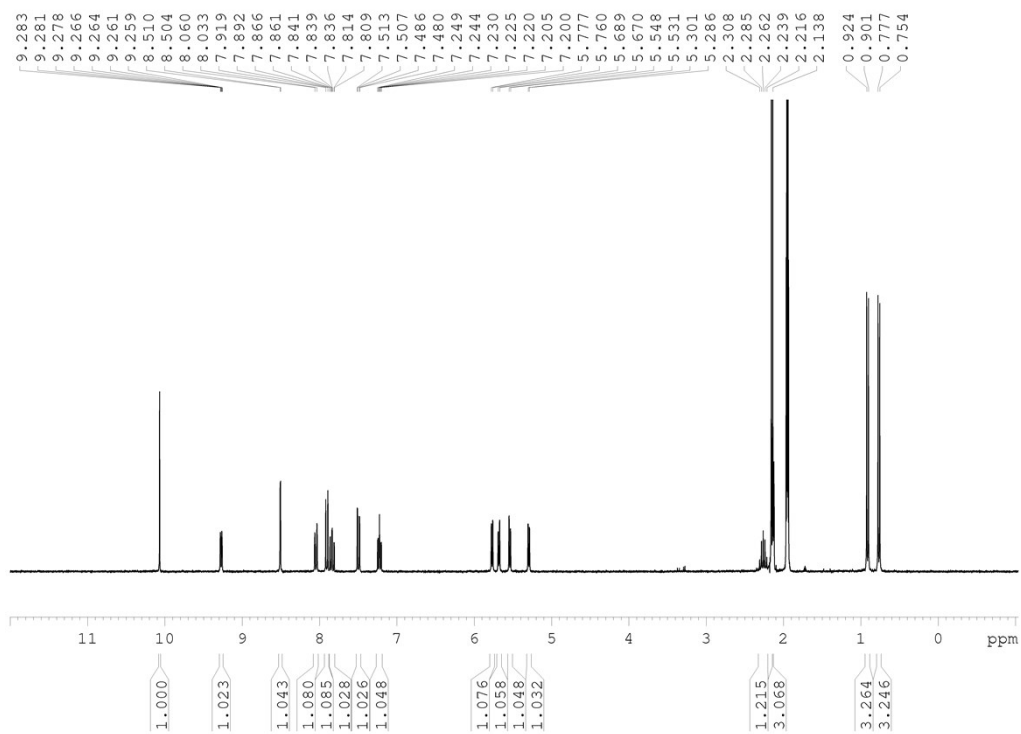

**Figure S14.** 300 MHz  $^1\text{H}$  NMR spectrum of complex **3a** in  $\text{CD}_3\text{CN}$ .

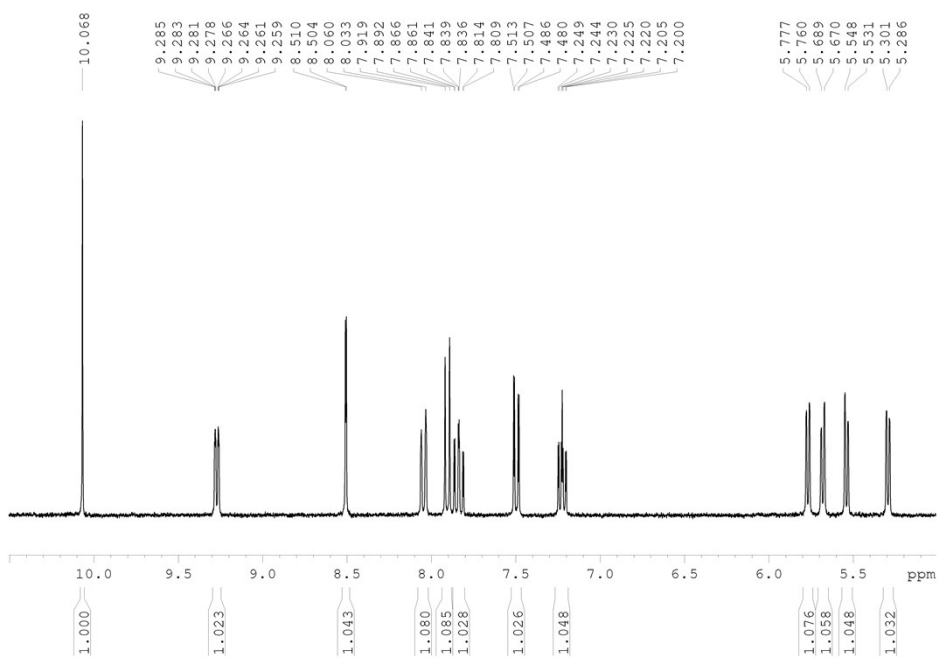

**Figure S15.** Aromatic region of  $^1\text{H}$  NMR spectrum of complex **3a** in  $\text{CD}_3\text{CN}$ .

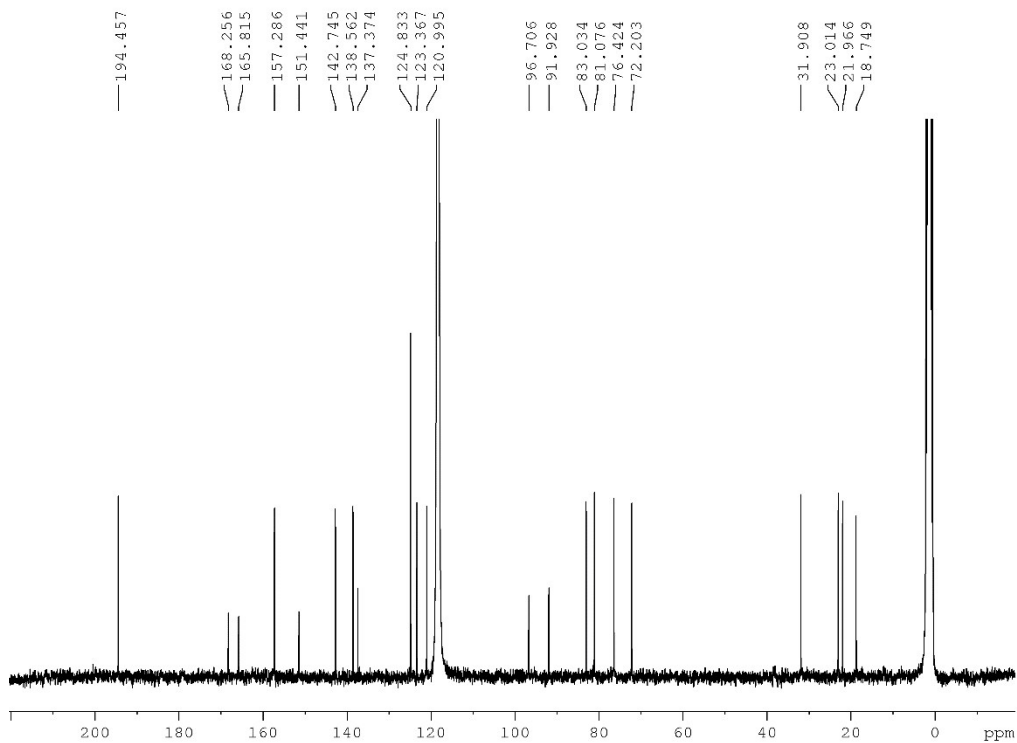

**Figure S16.** 75 MHz  $^{13}\text{C}$  NMR spectrum of complex **3a** in  $\text{CD}_3\text{CN}$ .

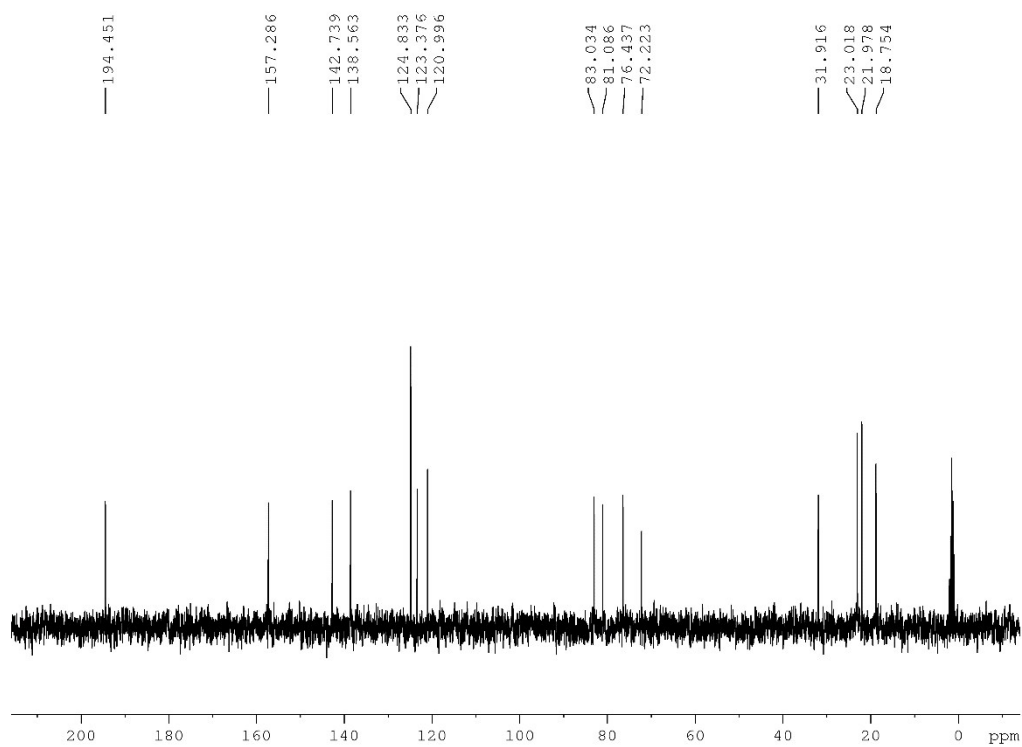

**Figure S17.** 75 MHz DEPT-135 NMR spectrum of complex **3a** in CD<sub>3</sub>CN.

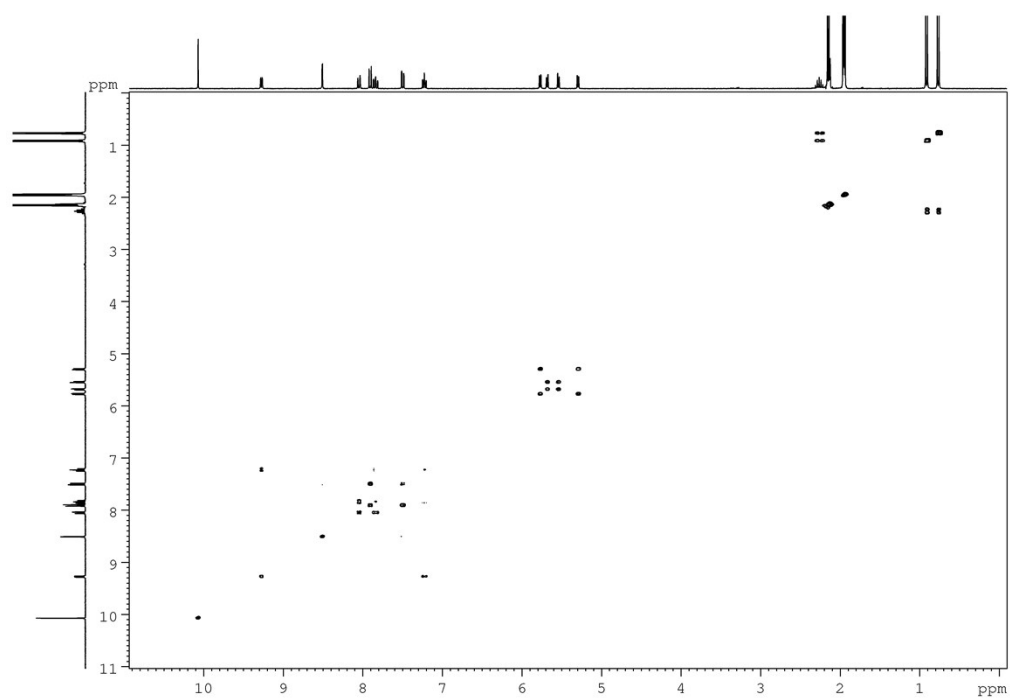

**Figure S18.** 300 MHz [<sup>1</sup>H, <sup>1</sup>H]-COSY NMR spectrum of complex **3a** in CD<sub>3</sub>CN.

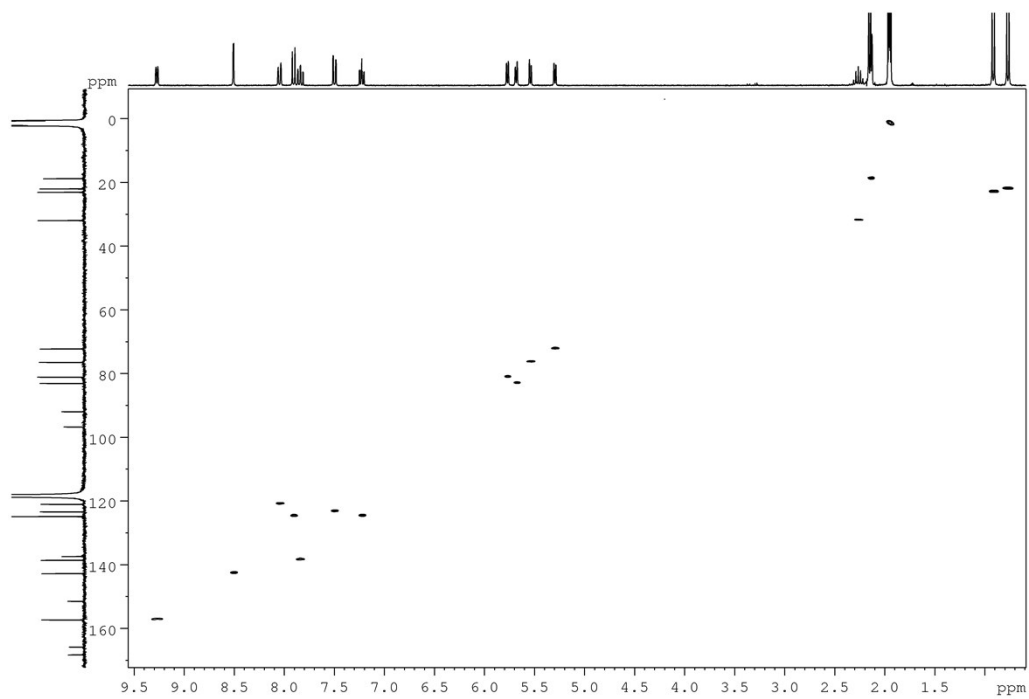

**Figure S19.** [ $^1\text{H}$ ,  $^{13}\text{C}$ ]-HSQC 2D NMR ( $^1\text{H}$ , 300 MHz) spectrum of complex **3a** in  $\text{CD}_3\text{CN}$ .

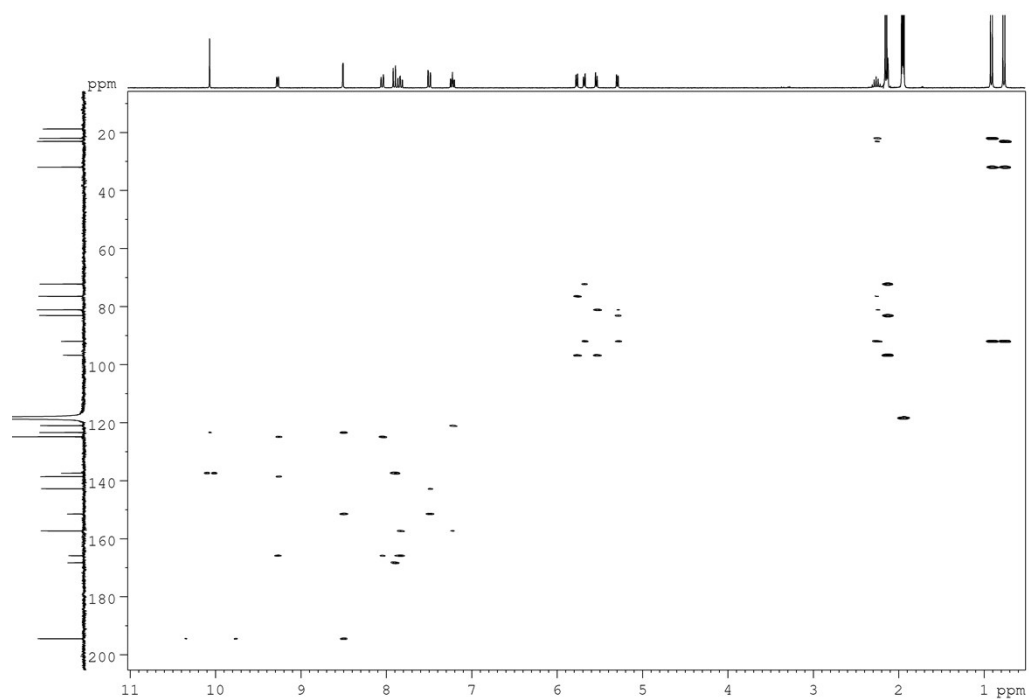

**Figure S20.** [ $^1\text{H}$ ,  $^{13}\text{C}$ ]-HMBC 2D NMR ( $^1\text{H}$ , 300 MHz) spectrum of complex **3a** in  $\text{CD}_3\text{CN}$ .

### Compound 4a

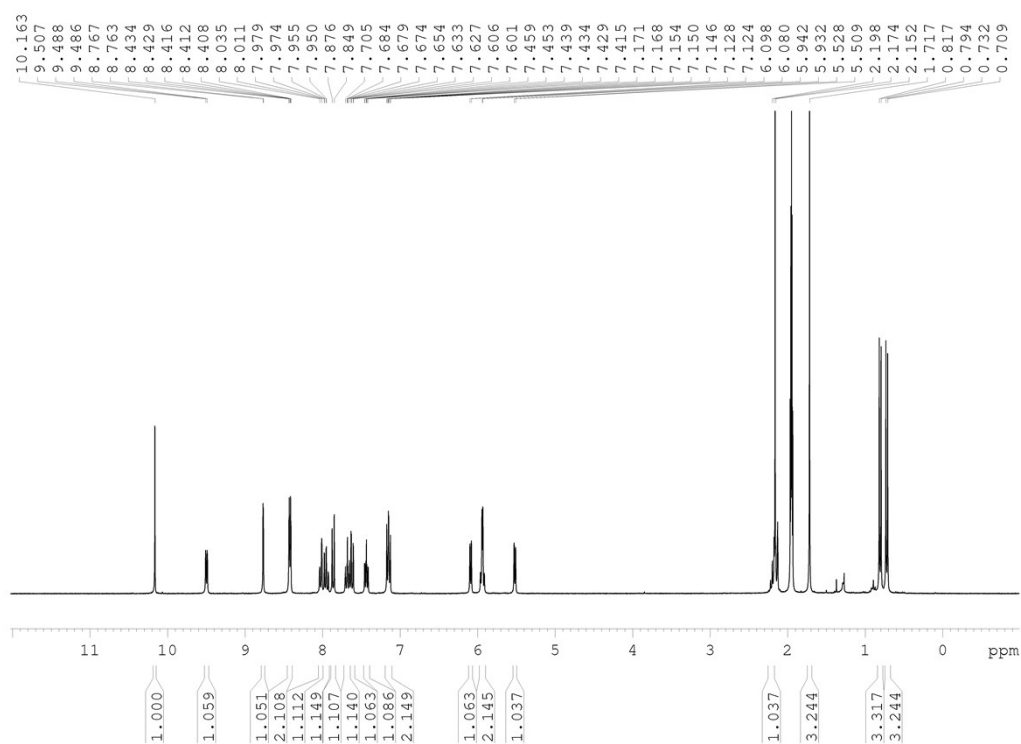

Figure S21. 300 MHz  $^1\text{H}$  NMR spectrum of complex **4a** in  $\text{CD}_3\text{CN}$ .

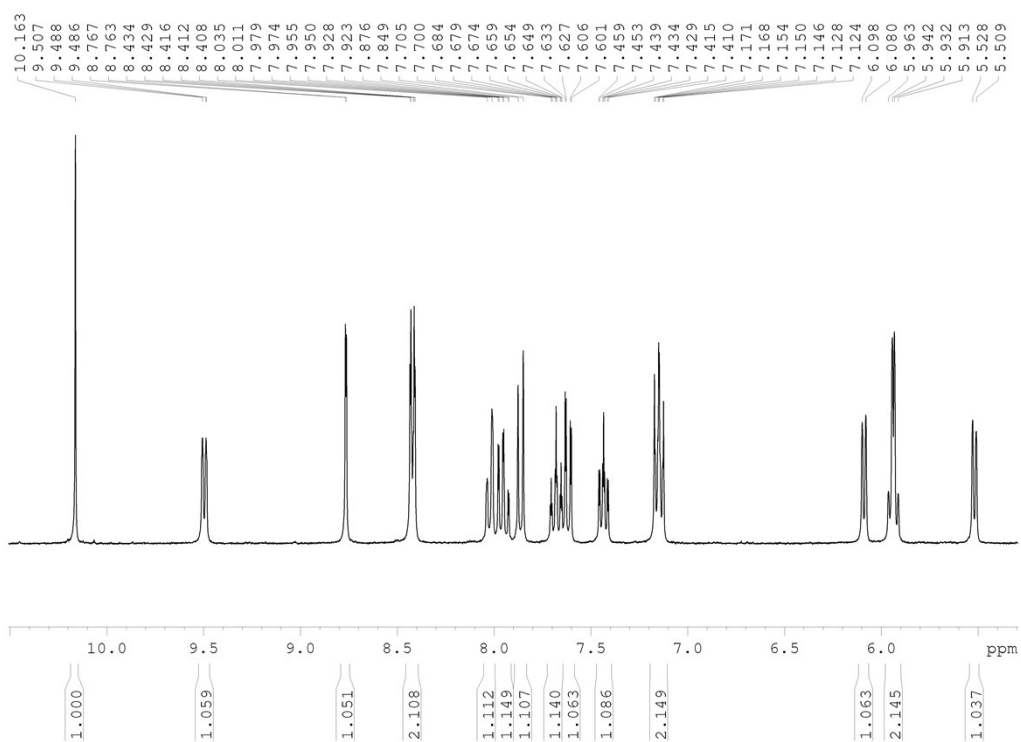

Figure S22. Aromatic region of  $^1\text{H}$  NMR spectrum of complex **4a** in  $\text{CD}_3\text{CN}$ .

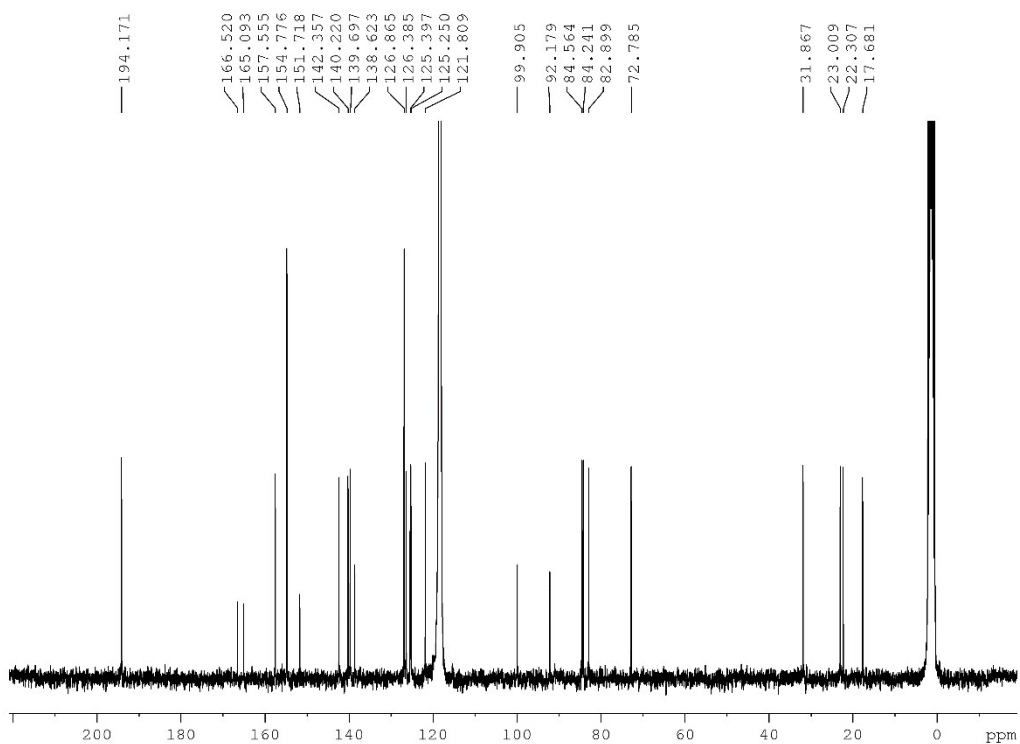

**Figure S23.** 75 MHz  $^{13}\text{C}$  NMR spectrum of complex **4a** in  $\text{CD}_3\text{CN}$ .

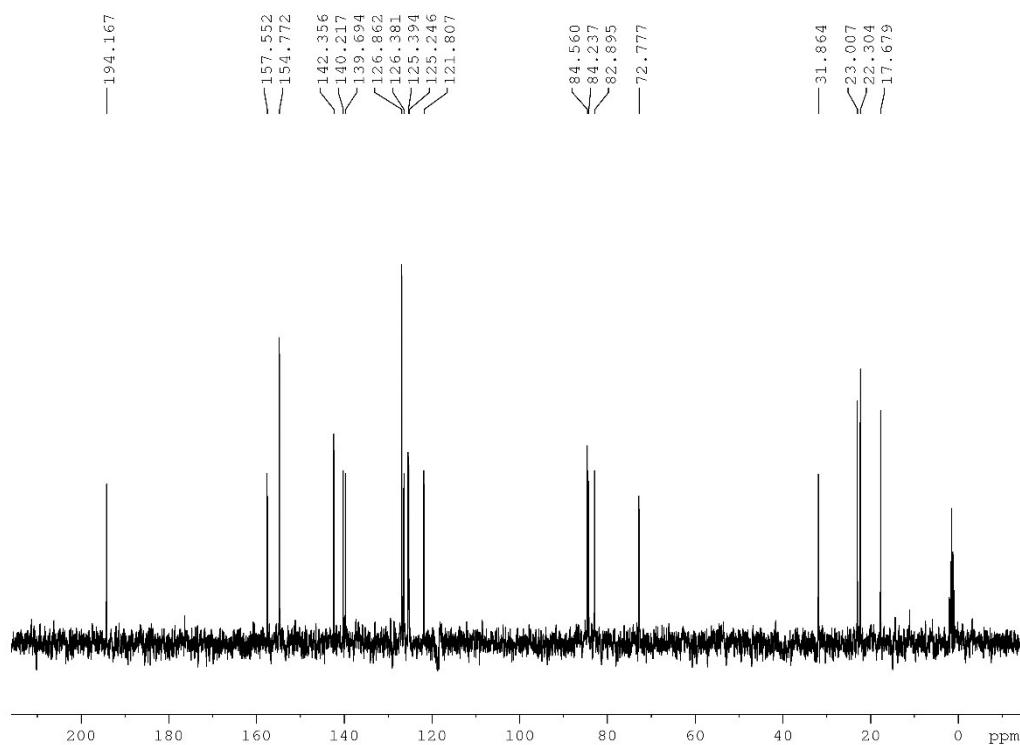

**Figure S24.** 75 MHz DEPT-135 NMR spectrum of complex **4a** in  $\text{CD}_3\text{CN}$ .



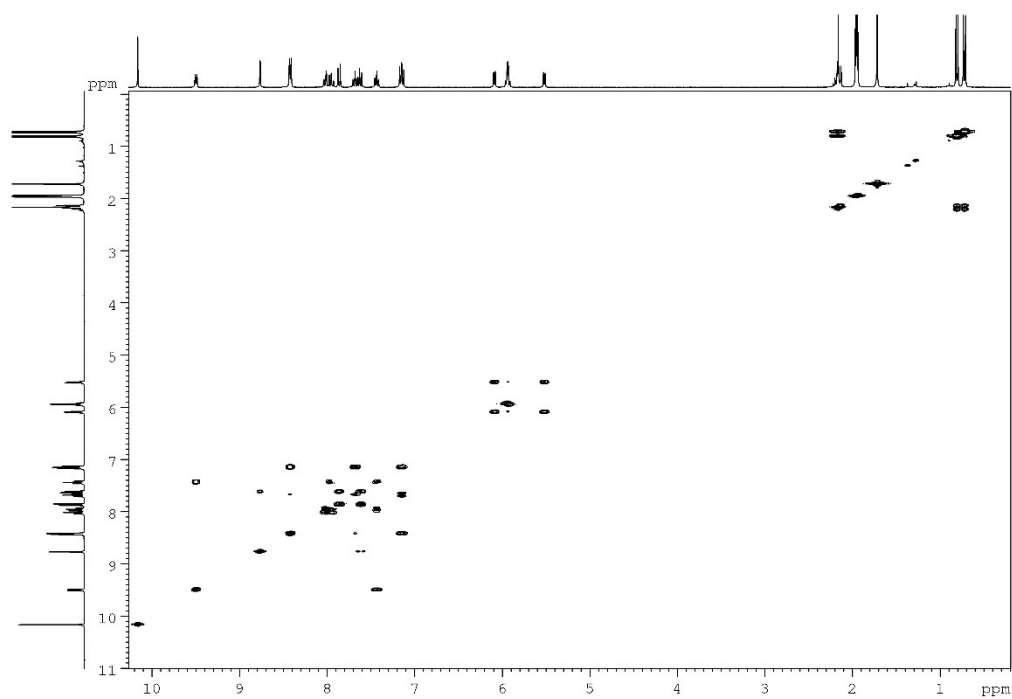

**Figure S25.** 300 MHz [ $^1\text{H}$ ,  $^1\text{H}$ ]-COSY NMR spectrum of complex **4a** in  $\text{CD}_3\text{CN}$ .

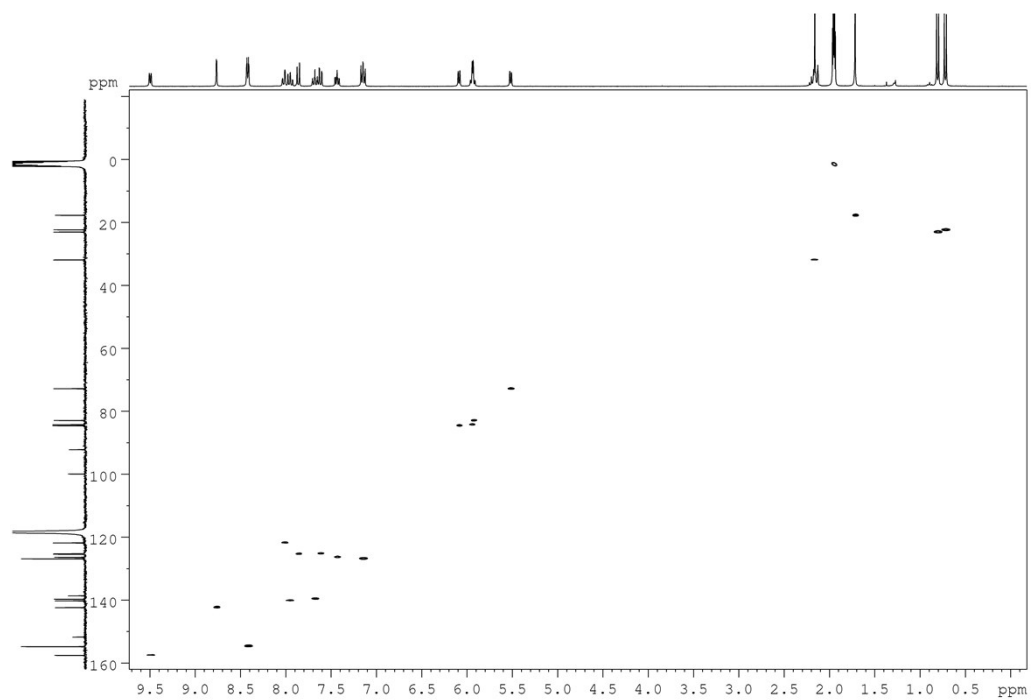

**Figure S26.** [ $^1\text{H}$ ,  $^{13}\text{C}$ ]-HSQC 2D NMR ( $^1\text{H}$ , 300 MHz) spectrum of complex **4a** in  $\text{CD}_3\text{CN}$ .

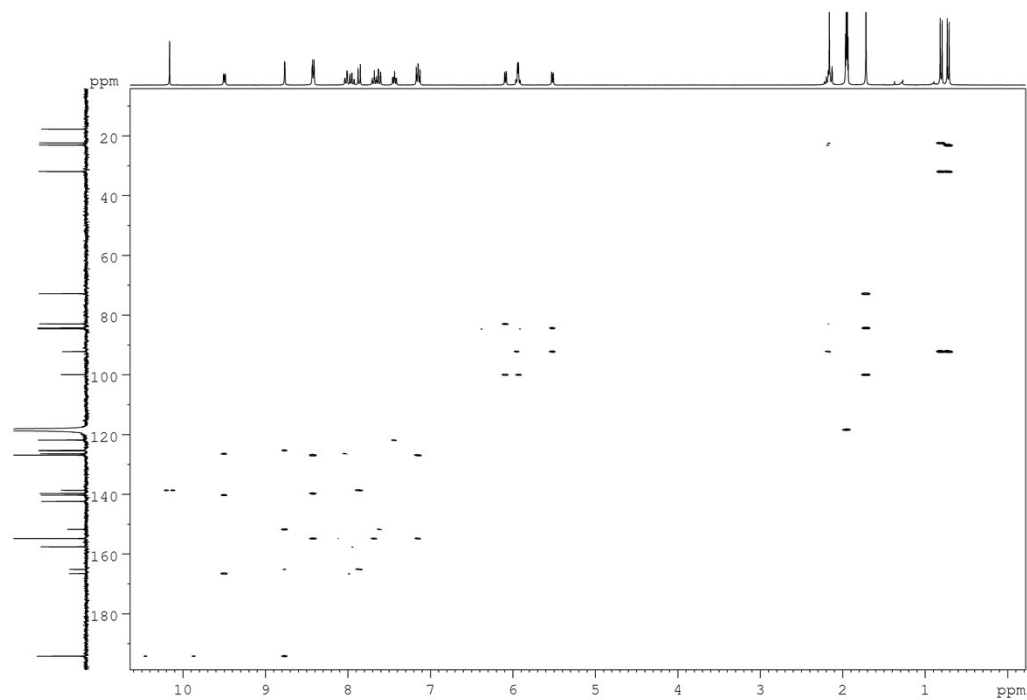

**Figure S27.** [ $^1\text{H}$ ,  $^{13}\text{C}$ ]-HMBC 2D NMR ( $^1\text{H}$ , 300 MHz) spectrum of complex **4a** in  $\text{CD}_3\text{CN}$ .

### Compound 5a

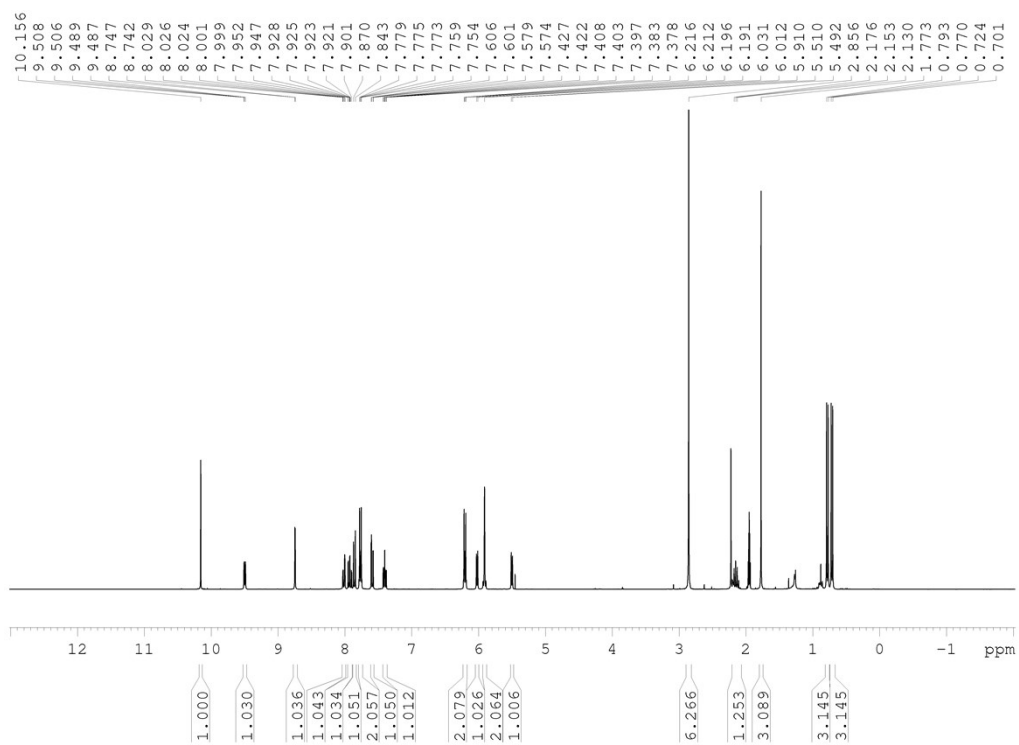

**Figure S28.** 300 MHz  $^1\text{H}$  NMR spectrum of complex **5a** in  $\text{CD}_3\text{CN}$ .

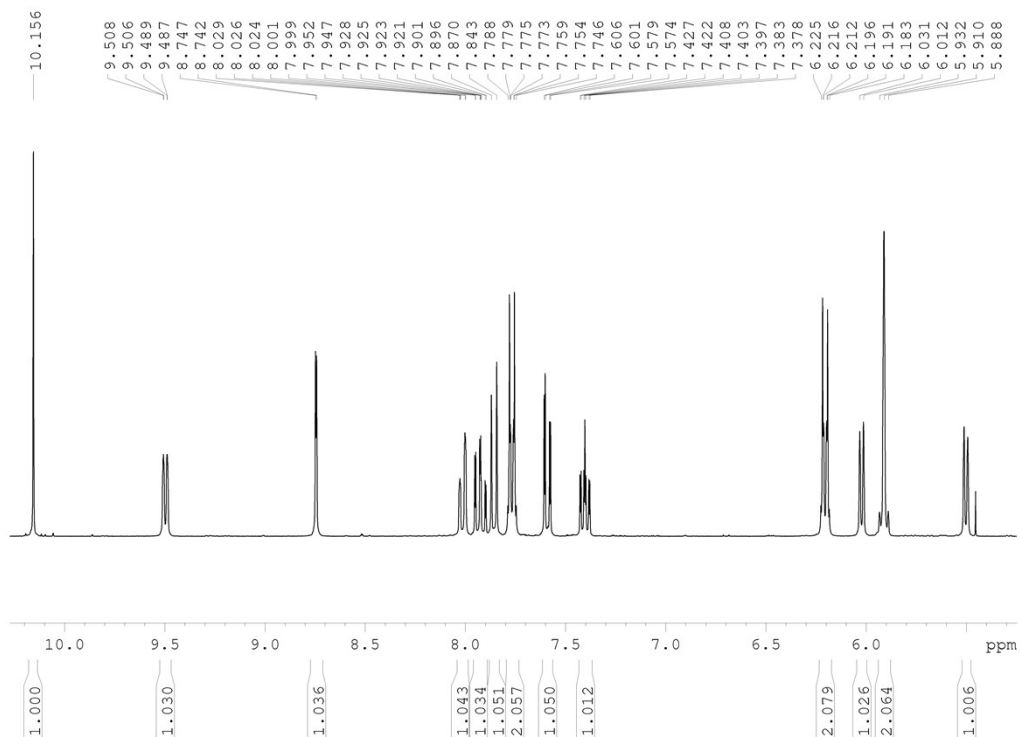

**Figure S29.** Aromatic region of  $^1\text{H}$  NMR spectrum of complex **5a** in  $\text{CD}_3\text{CN}$ .

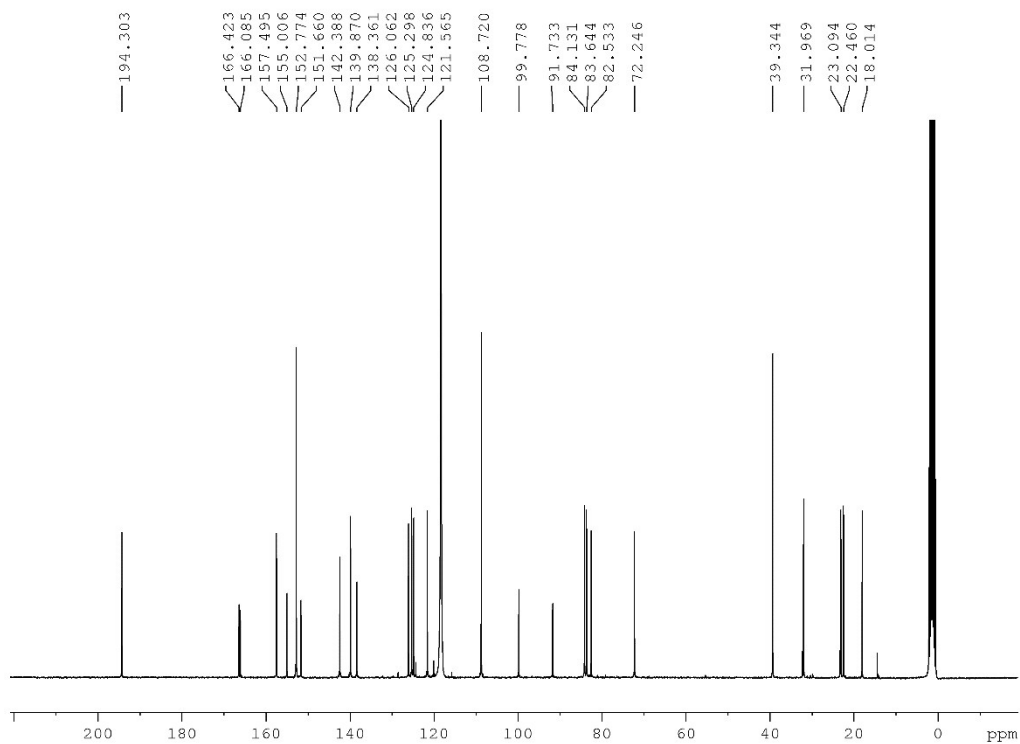

**Figure S30.** 75 MHz  $^{13}\text{C}$  NMR spectrum of complex **5a** in  $\text{CD}_3\text{CN}$ .

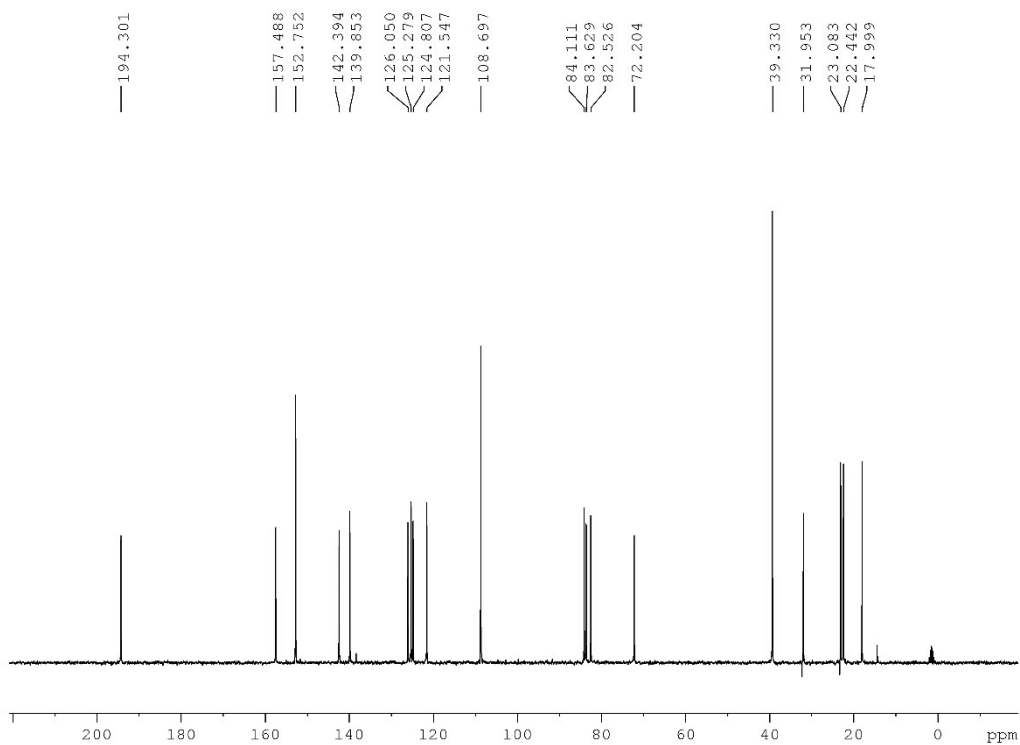

**Figure S31.** 75 MHz DEPT-135 NMR spectrum of complex **5a** in CD<sub>3</sub>CN.

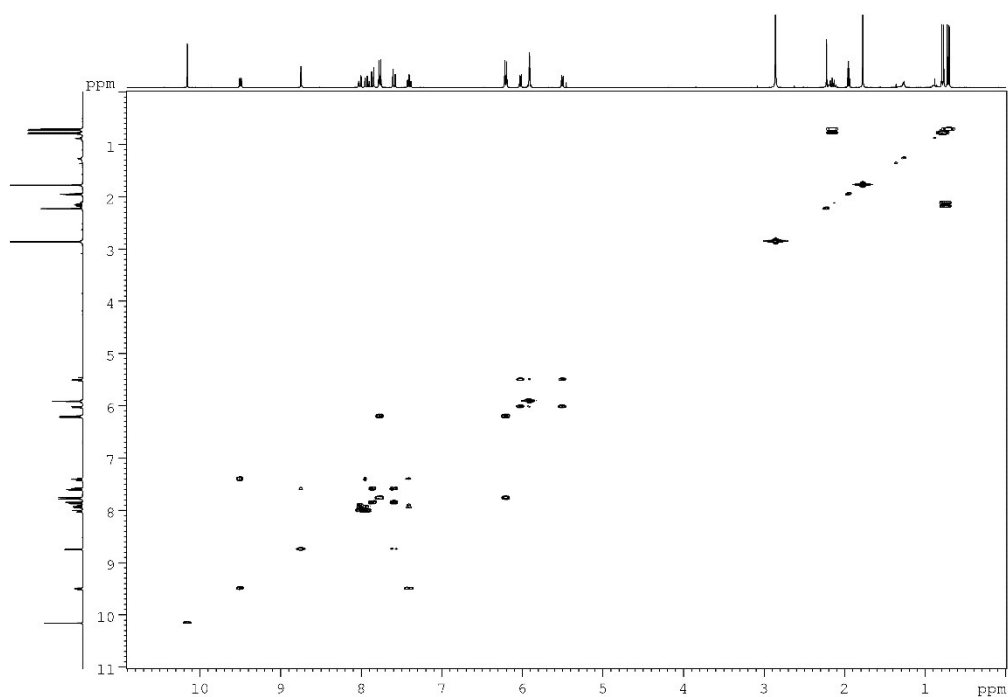

**Figure S32.** 300 MHz [<sup>1</sup>H, <sup>1</sup>H]-COSY NMR spectrum of complex **5a** in CD<sub>3</sub>CN.

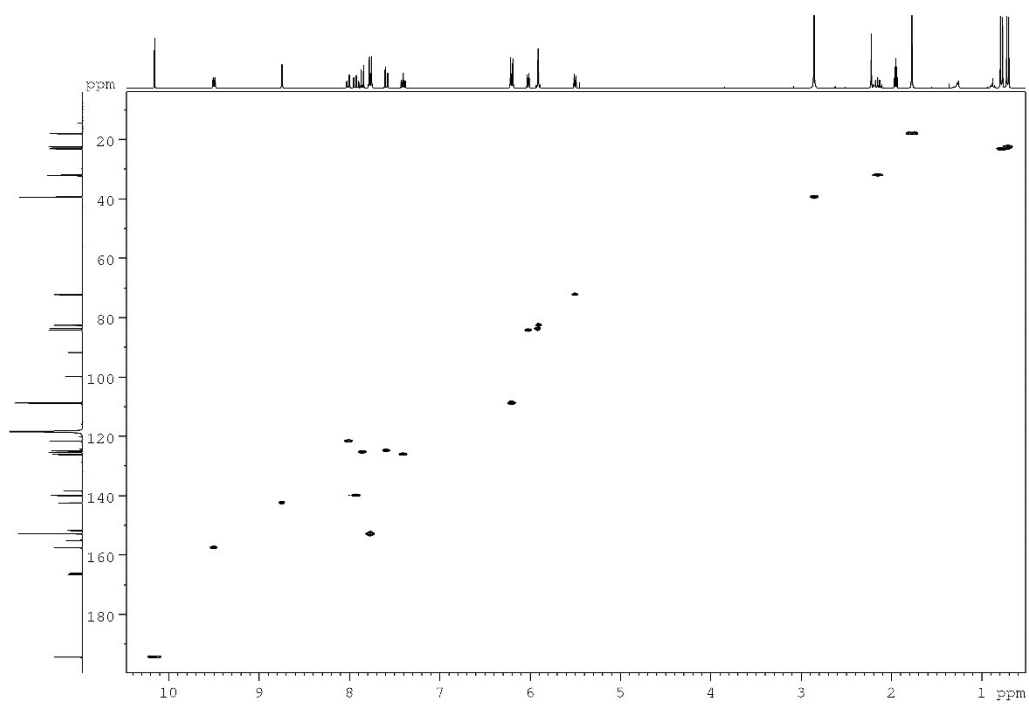

**Figure S33.** [ $^1\text{H}$ ,  $^{13}\text{C}$ ]-HSQC 2D NMR ( $^1\text{H}$ , 300 MHz) spectrum of complex **5a** in  $\text{CD}_3\text{CN}$ .

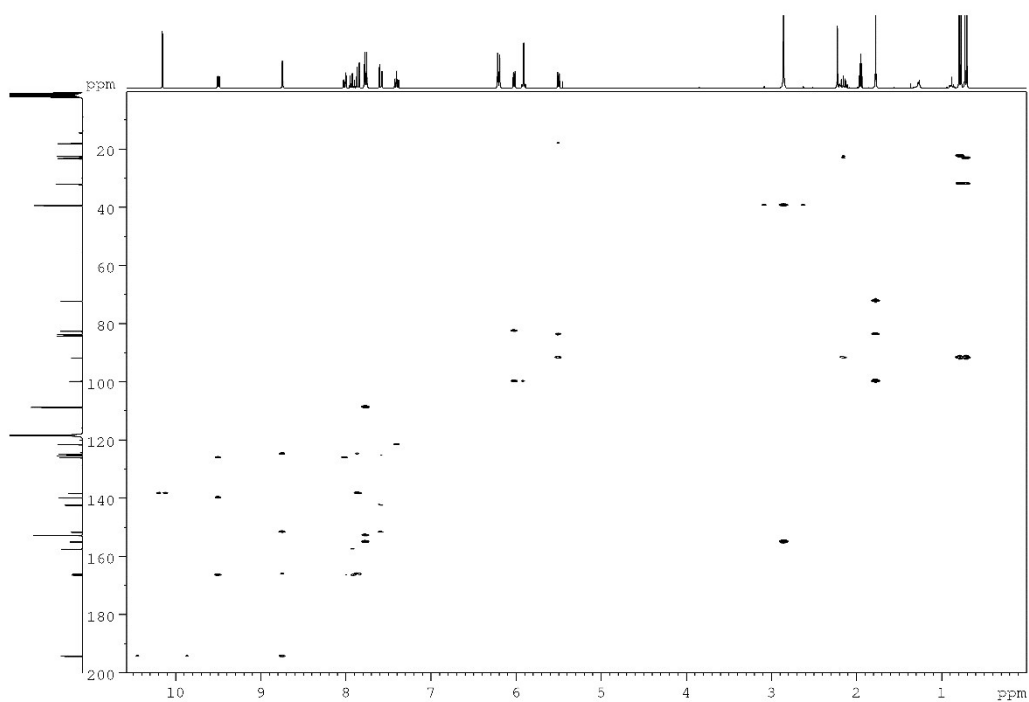

**Figure S34.** [ $^1\text{H}$ ,  $^{13}\text{C}$ ]-HMBC 2D NMR ( $^1\text{H}$ , 300 MHz) spectrum of complex **5a** in  $\text{CD}_3\text{CN}$ .

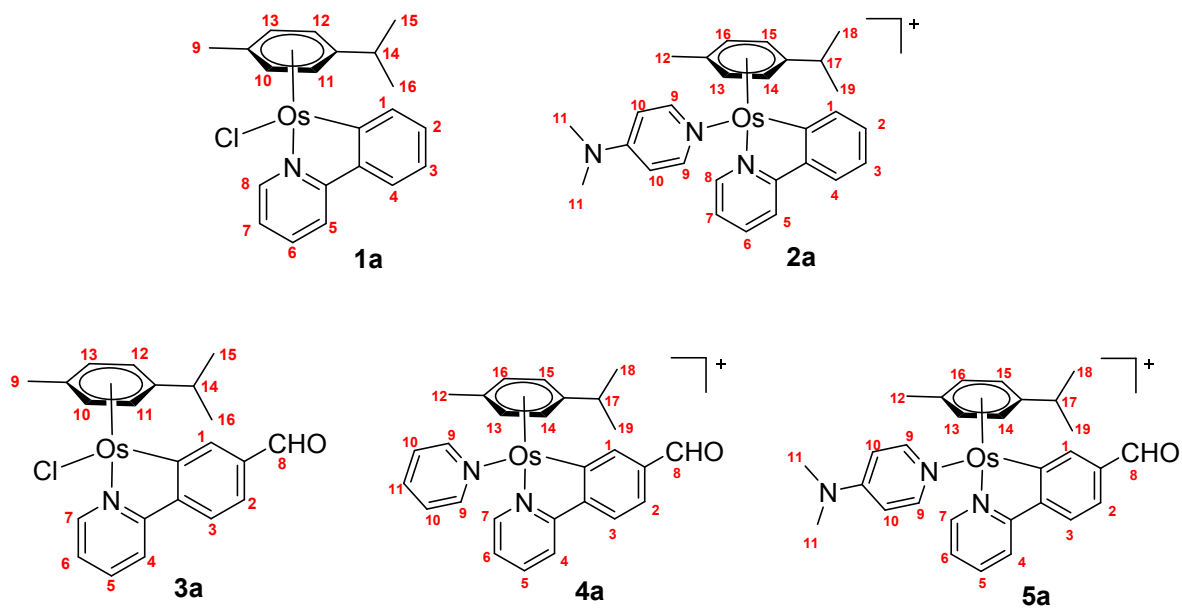

**Figure S35.** Proton numeration of compounds **1a-5a** used in the signal  $^1\text{H-NMR}$  assignment.

### 5. Absorption and emission spectra of complexes **1a-5a**

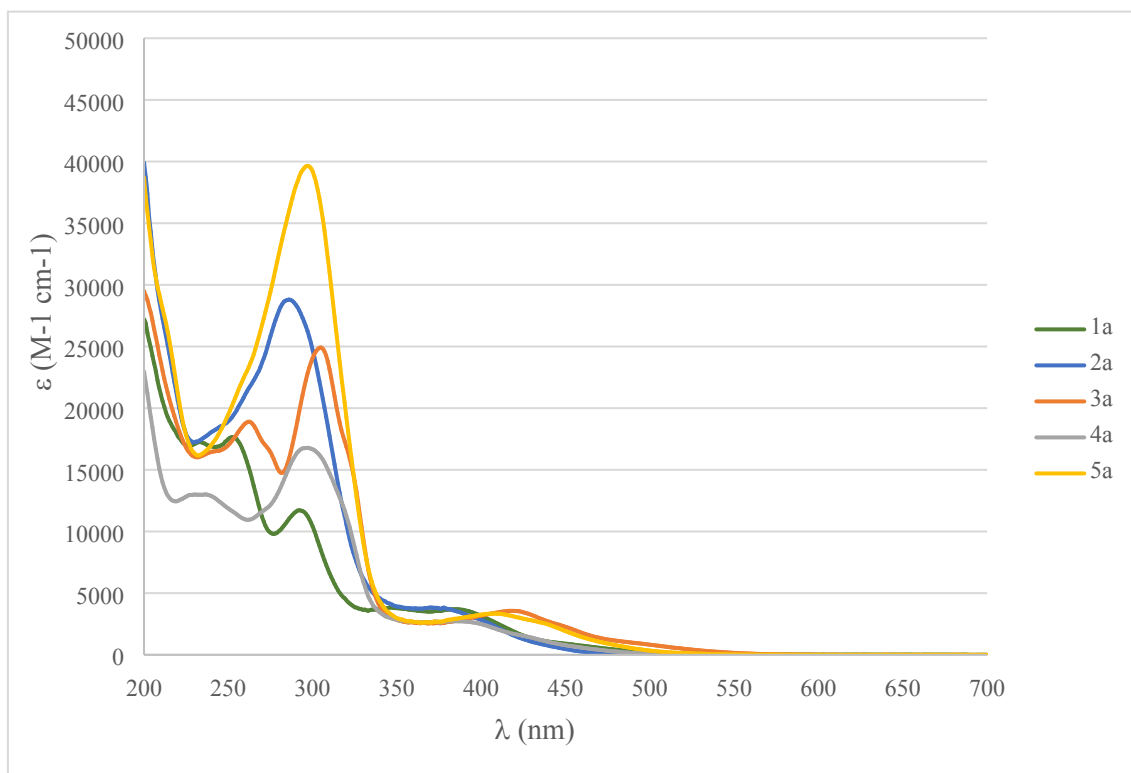

**Figure S36.** Absorption spectra of complexes **1a-5a** in  $\text{CD}_3\text{CN}$  at  $25\text{ }^\circ\text{C}$ .

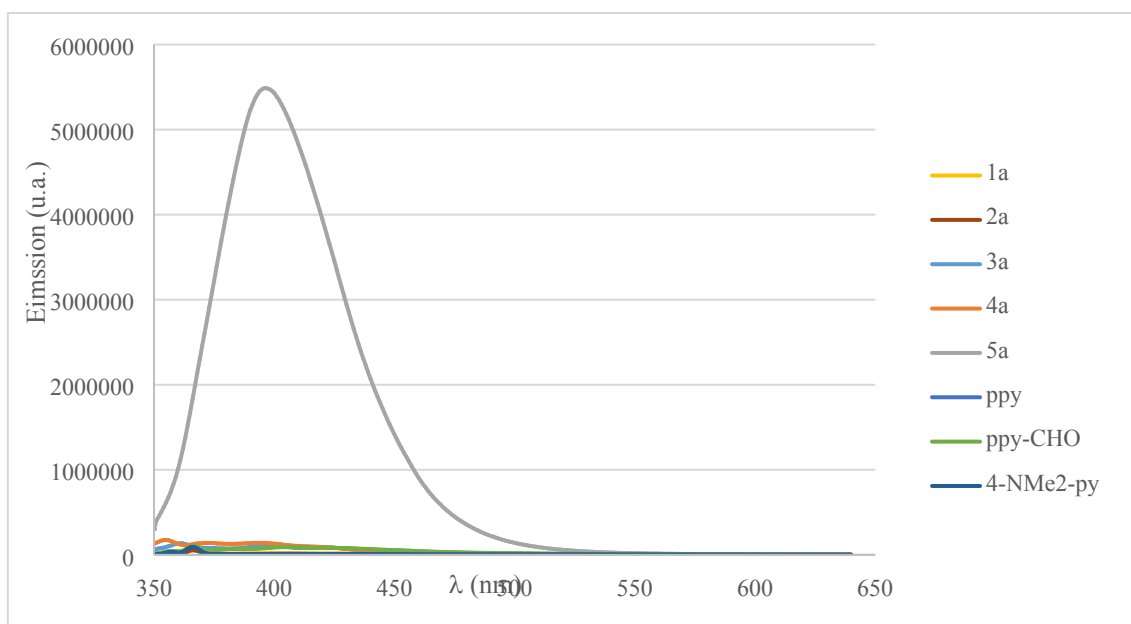

**Figure S37.** Emission spectra ( $\lambda_{\text{ex}} = 330 \text{ nm}$ ) of complexes **1a-5a**, and ligands and proligands at  $50 \mu\text{M}$  in  $\text{CD}_3\text{CN}$  at  $25 \text{ }^\circ\text{C}$ .

## 6. UV-VIS stability study of compounds **1a** and **2a**

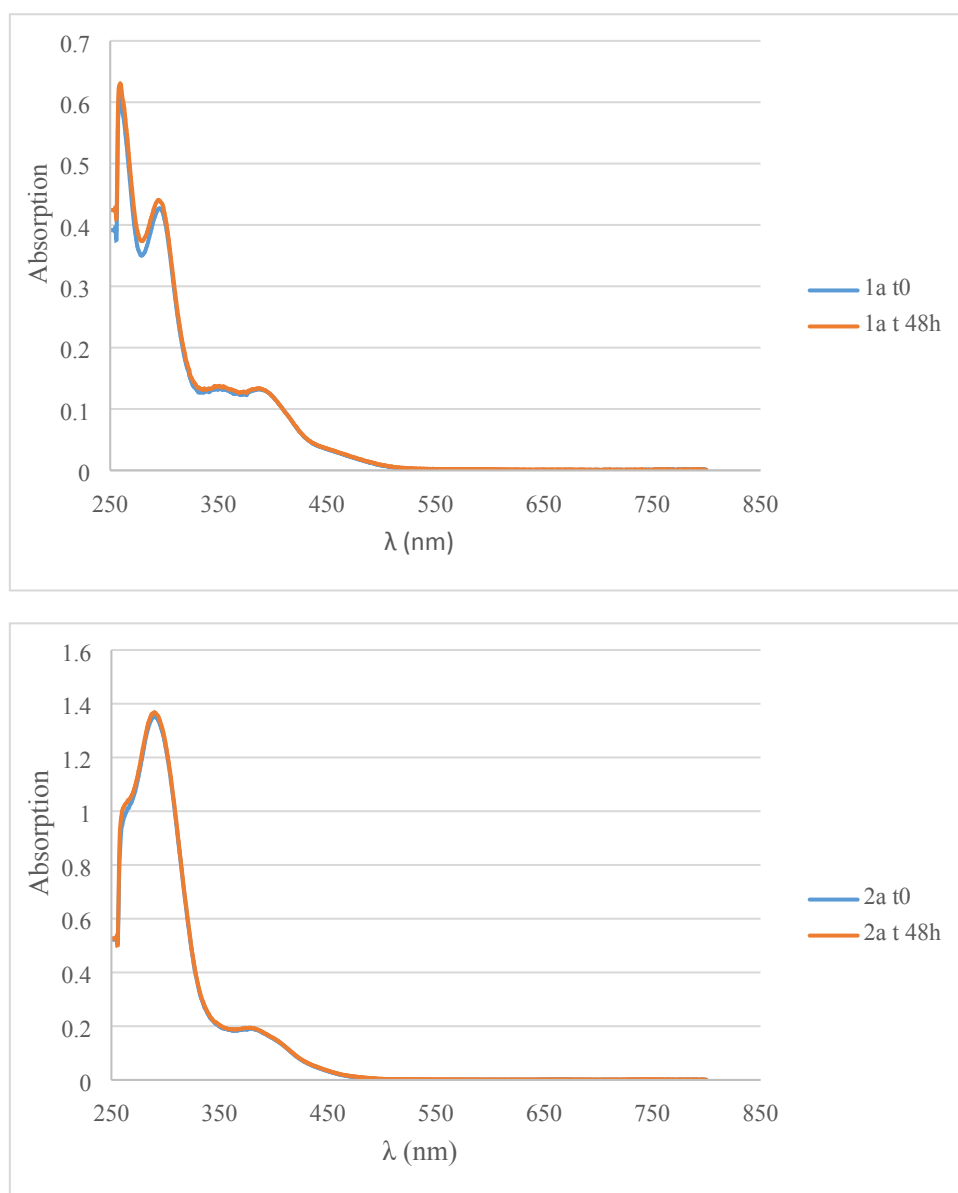

**Figure S38.** UV-VIS spectra of complexes **1a** (up) and **2a** (down) (50  $\mu$ M in DMSO) at  $t = 0$  h and after incubation at 37  $^{\circ}$ C for 48 hours.



## 7. HPLC-MS stability studies of compounds 3a-5a

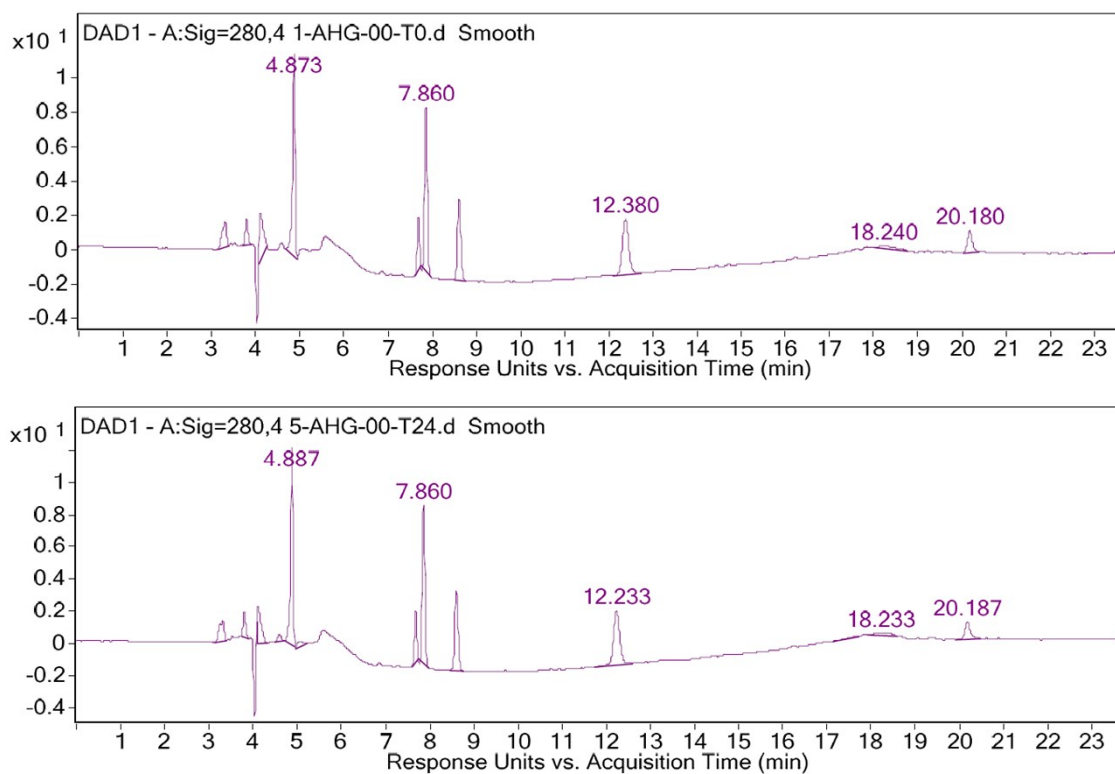

**Figure S39.** HPLC chromatograms of RPMI medium with 5% of DMSO. Top: t = 0 h. Bottom: t= 24 h.

### Complex 3a

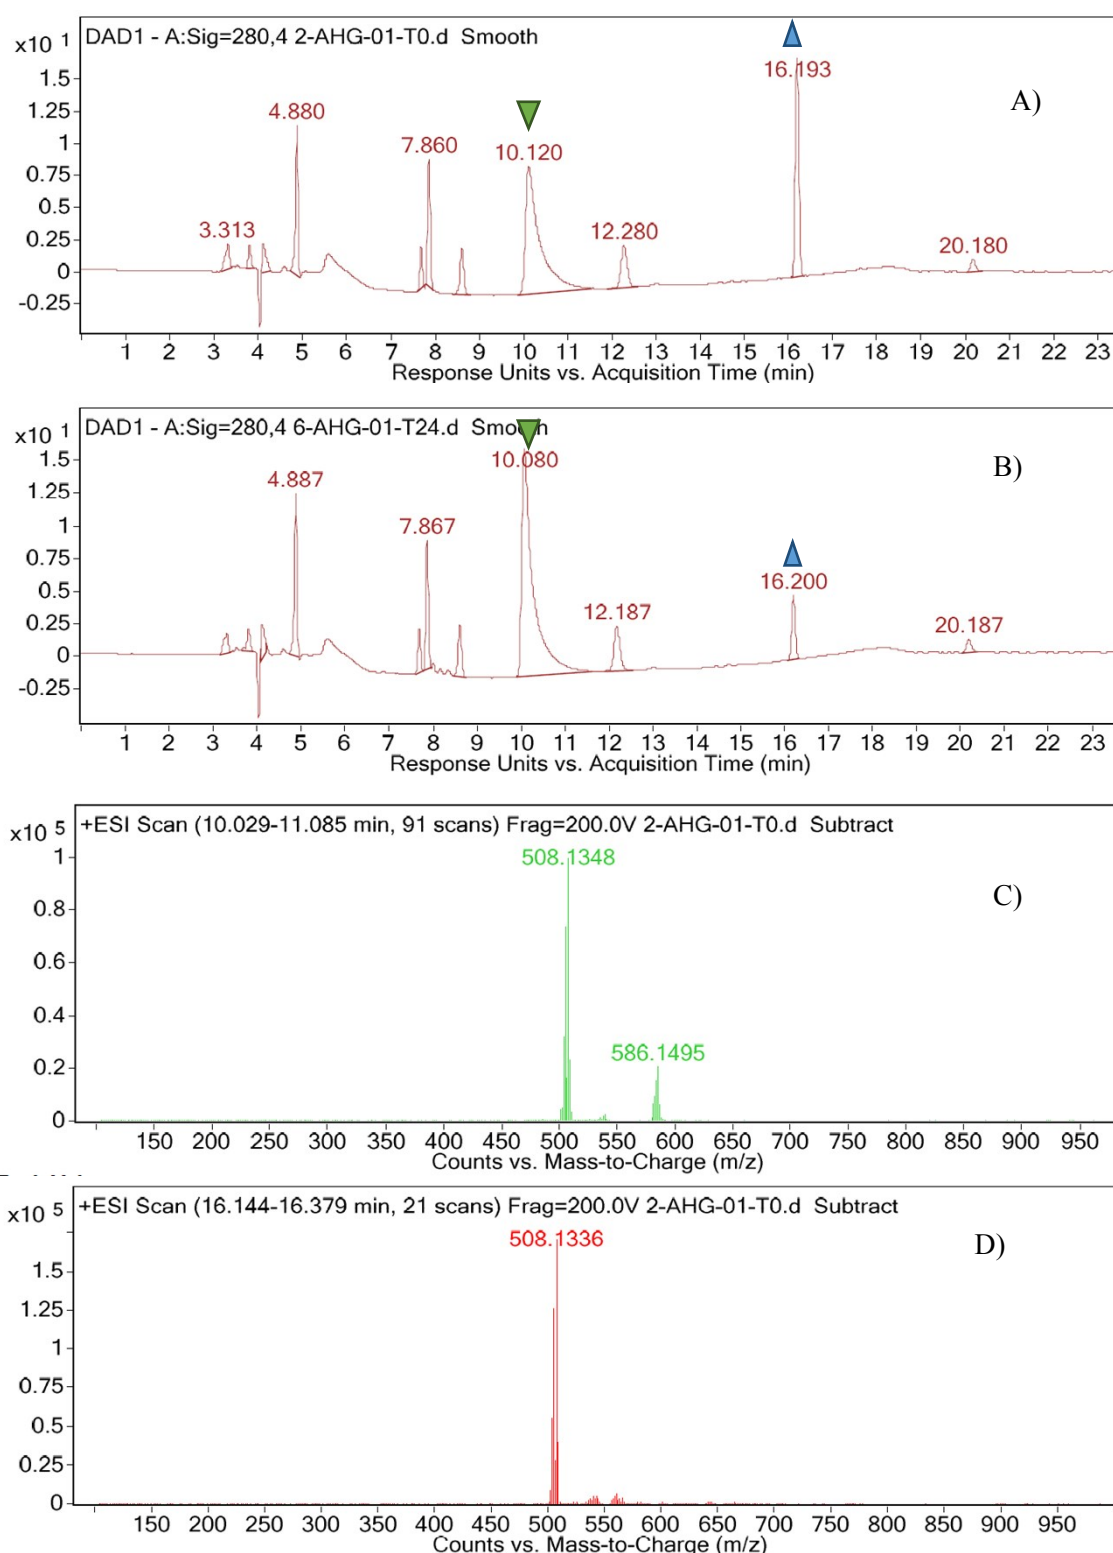

**Figure S40.** A) HPLC chromatogram of RPMI medium with compound **3a** in 5% of DMSO at  $t = 0$  h. B) HPLC chromatogram of RPMI medium with compound **3a** in 5% of DMSO after incubation at 37°C during 24 h. C) ESI-MS of the peak with  $t_R=10$  min related to the DMSO-Complex **3a** ▼. D) ESI-MS of the peak with  $t_R=16$  min related to the Complex **3a** ▲

### Complex 4a

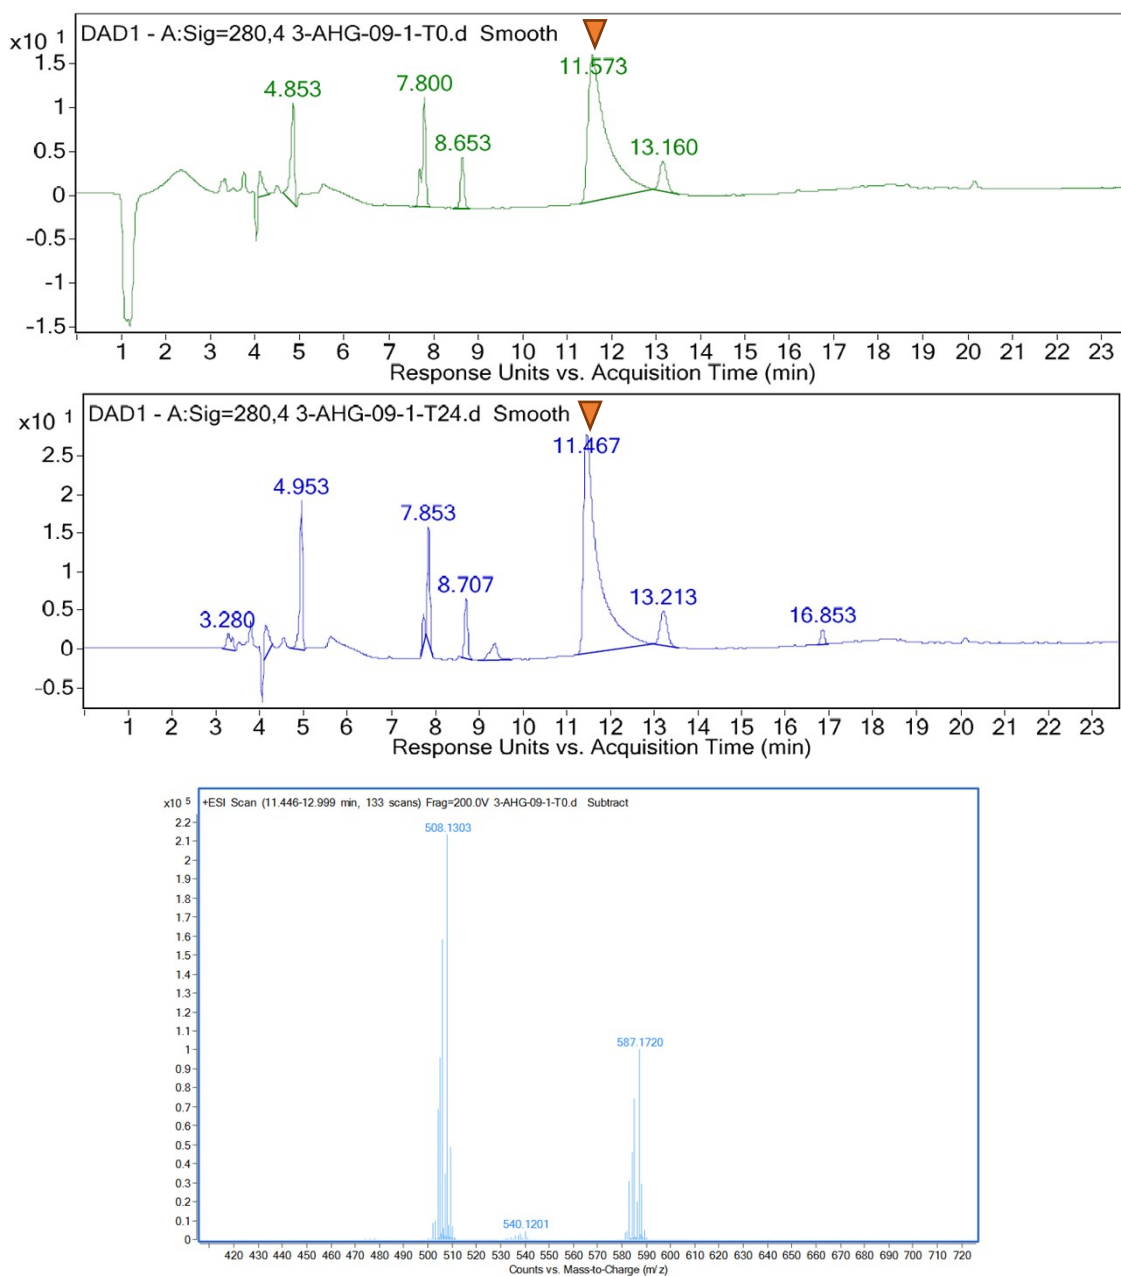

**Figure S41.** Top: HPLC chromatogram of RPMI medium with compound **4a** in 5% of DMSO at  $t = 0$  h. Middel: HPLC chromatogram of RPMI medium with compound **4a** in 5% of DMSO after incubation at 37°C during 24 h. Bottom: ESI-MS of the peak with  $t_R=11$  min related to the Complex **4a** ▼.

### Complex 5a

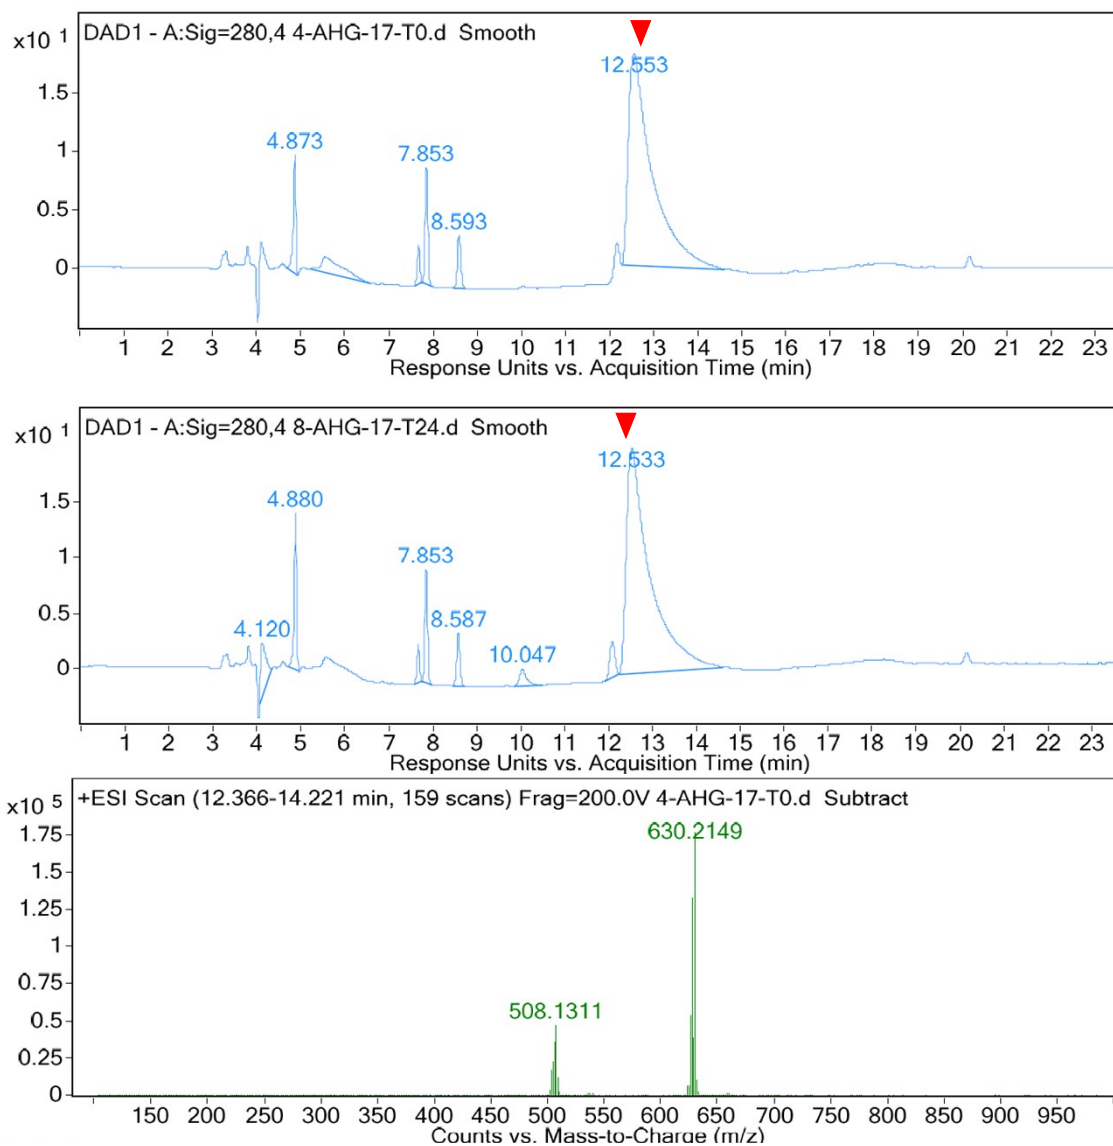

**Figure S42.** Top: HPLC chromatogram of RPMI medium with compound **5a** in 5% of DMSO at  $t = 0$  h. Middle: HPLC chromatogram of RPMI medium with compound **5a** in 5% of DMSO after incubation at 37°C during 24 h. Bottom: ESI-MS of the peak with  $t_R=11$  min related to the Complex **5a** ▼.

## 8. Hydrolysis of complex 3a

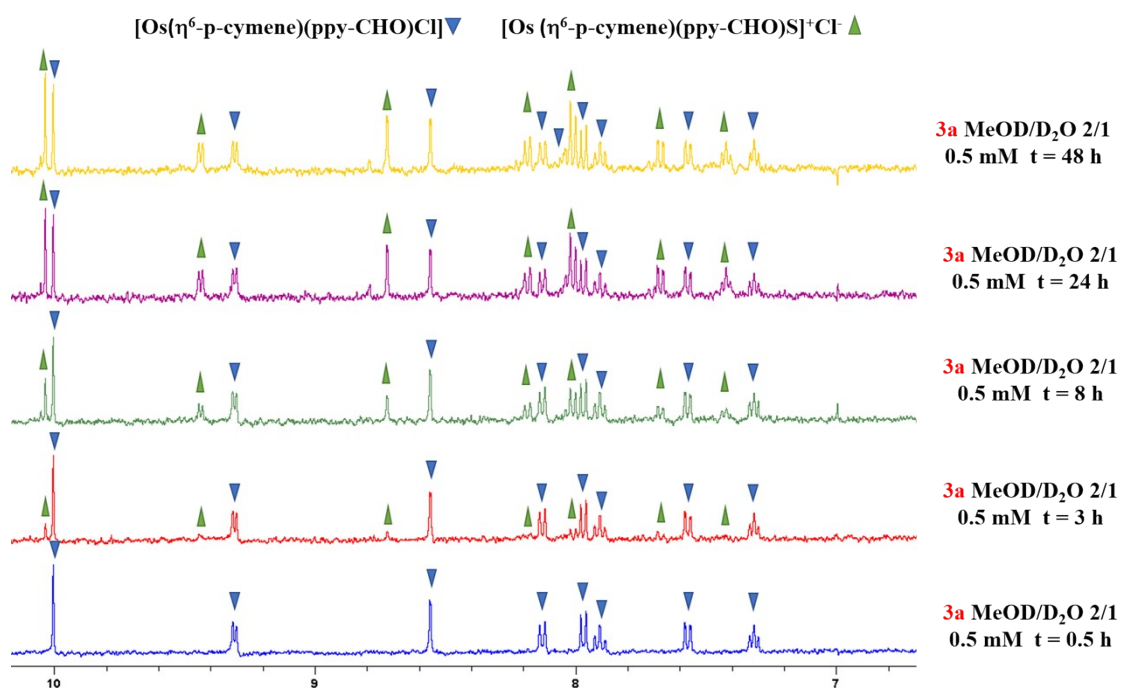

**Figure S43.** <sup>1</sup>H-NMR spectra of compound **3a** (0.5 mM in 600 μL of mixture of 2/1 methanol and deuterated water) after different times  $\blacktriangle$ : $[\text{Os}(\eta^6\text{-p-cymene})(\text{ppy-CHO})\text{Cl}]$  and  $\blacktriangledown$ : $[\text{Os}(\eta^6\text{-p-cymene})(\text{ppy-CHO})(\text{OH}_2)]^+$ .

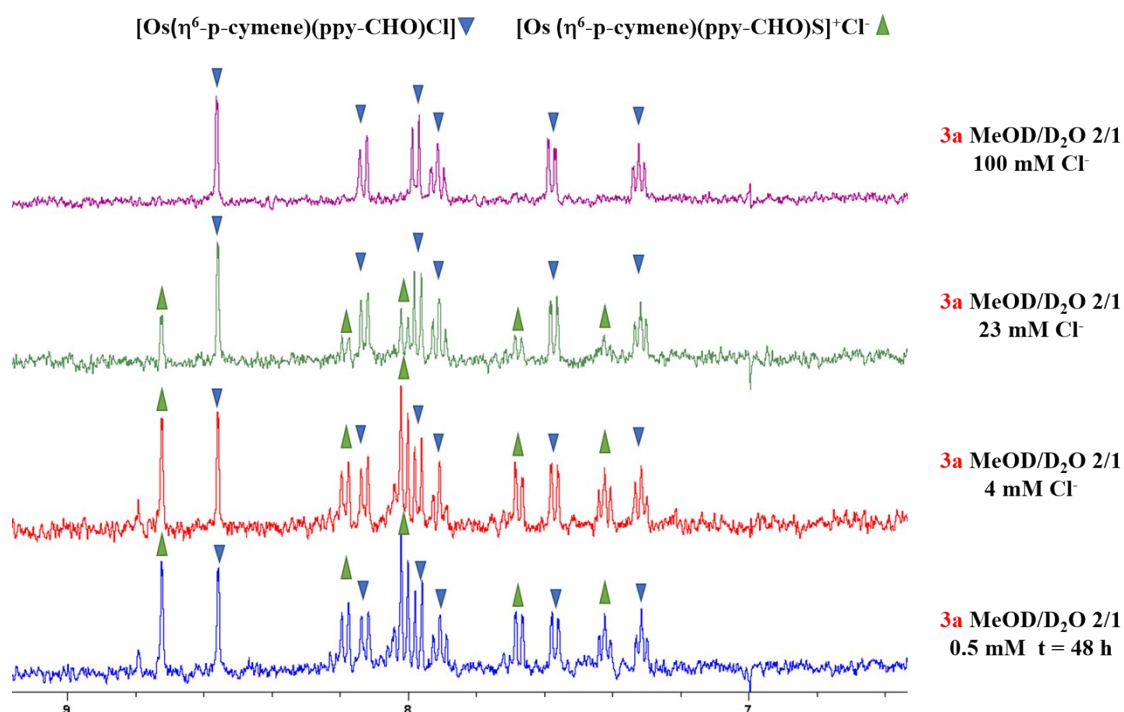

**Figure S44.** <sup>1</sup>H-NMR spectra of compound **3a** (0.5 mM in 600 μL of mixture of 2/1 methanol and deuterated water) after 48 hours and with consecutive additions of chloride ion  $\blacktriangle$ : $[\text{Os}(\eta^6\text{-p-cymene})(\text{ppy-CHO})\text{Cl}]$  and  $\blacktriangledown$ : $[\text{Os}(\eta^6\text{-p-cymene})(\text{ppy-CHO})(\text{OH}_2)]^+$ .

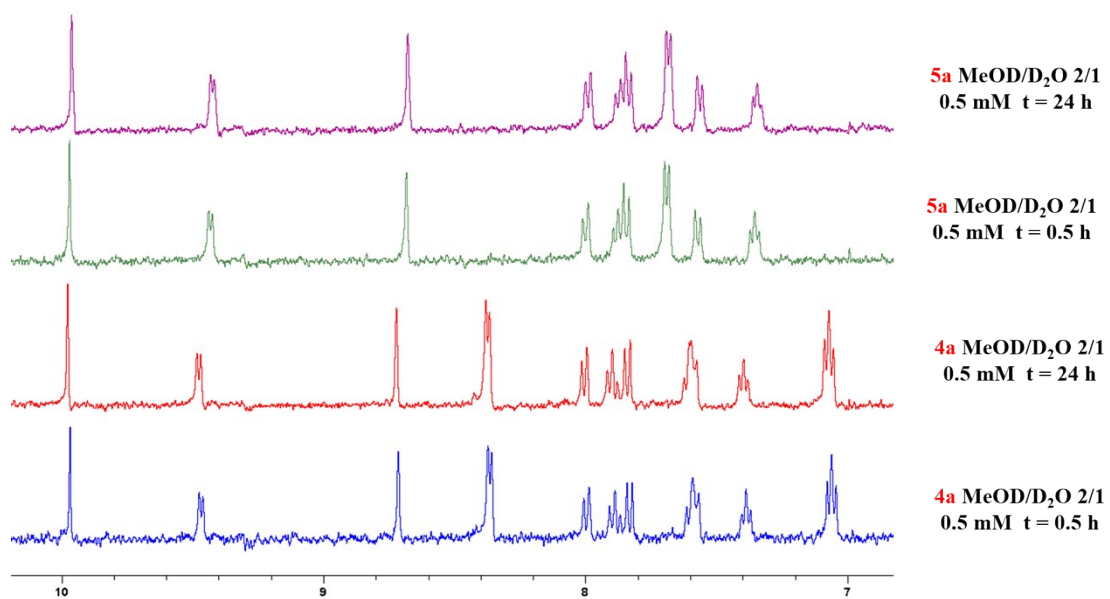

**Figure S45.** <sup>1</sup>H-NMR spectra of compound **4a** and **5a** (0.5 mM in 600 μL of mixture of 2/1 methanol and deuterated water) at different times.

## 9. X-Ray structures of compounds 3a-5a

**Special features:** Compound **4a**: The triflate anion is disordered over two positions.

**Table S1.** Crystal data and structure refinement for complexes **3a**, **4a** and **5a**

| Complex                                           | <b>3a</b>                                    | <b>4a</b>                                                                        | <b>5a</b>                                                                        |
|---------------------------------------------------|----------------------------------------------|----------------------------------------------------------------------------------|----------------------------------------------------------------------------------|
| Empirical formula                                 | C <sub>22</sub> H <sub>22</sub> ClNOOs       | C <sub>28</sub> H <sub>27</sub> F <sub>3</sub> N <sub>2</sub> O <sub>4</sub> OsS | C <sub>30</sub> H <sub>32</sub> F <sub>3</sub> N <sub>3</sub> O <sub>4</sub> OsS |
| Formula weight                                    | 542.05                                       | 734.77                                                                           | 777.84                                                                           |
| Temperature/ K                                    | 100(2)                                       | 100(2)                                                                           | 100(2)                                                                           |
| Wavelength/ Å                                     | 0.71073                                      | 0.71073                                                                          | 0.71073                                                                          |
| Crystal system                                    | Monoclinic                                   | Monoclinic                                                                       | Monoclinic                                                                       |
| Space group                                       | P2 <sub>1</sub> /n                           | P2 <sub>1</sub> /n                                                               | P2 <sub>1</sub> /n                                                               |
| Unit cell dimensions                              |                                              |                                                                                  |                                                                                  |
| a/ Å                                              | 11.1387(4)                                   | 12.1045(5)                                                                       | 11.4840(6)                                                                       |
| b/ Å                                              | 13.1760(5)                                   | 16.9592(7)                                                                       | 14.3590(8)                                                                       |
| c/ Å                                              | 12.5063(5)                                   | 12.9824(6)                                                                       | 17.8290(10)                                                                      |
| α/ °                                              | 90                                           | 90                                                                               | 90                                                                               |
| β/ °                                              | 91.3700(10)                                  | 92.737(2)                                                                        | 96.510(2)                                                                        |
| γ/ °                                              | 90                                           | 90                                                                               | 90                                                                               |
| Volume/ Å <sup>3</sup>                            | 1834.94(12)                                  | 2662.0(2)                                                                        | 2921.0(3)                                                                        |
| Z                                                 | 4                                            | 4                                                                                | 4                                                                                |
| Density <sub>calculated</sub> / Mg/m <sup>3</sup> | 1.962                                        | 1.833                                                                            | 1.769                                                                            |
| Absorption coefficient/ mm <sup>-1</sup>          | 7.106                                        | 4.928                                                                            | 4.497                                                                            |
| F(000)                                            | 1048                                         | 1440                                                                             | 1536                                                                             |
| Crystal size/ mm <sup>3</sup>                     | 0.330 x 0.250 x 0.210                        | 0.300 x 0.300 x 0.140                                                            | 0.260 x 0.240 x 0.050                                                            |
| Theta range for data collection/ °                | 2.246 to 30.609                              | 1.977 to 30.568                                                                  | 1.826 to 27.101                                                                  |
| Index ranges                                      | -15 ≤ h ≤ 15<br>-18 ≤ k ≤ 18<br>-17 ≤ l ≤ 17 | -17 ≤ h ≤ 16<br>-24 ≤ k ≤ 22<br>-18 ≤ l ≤ 18                                     | -14 ≤ h ≤ 14<br>-18 ≤ k ≤ 18<br>-22 ≤ l ≤ 22                                     |
| Reflections collected                             | 120198                                       | 29336                                                                            | 113650                                                                           |
| Independent reflections                           | 5630 [R <sub>int</sub> = 0.0385]             | 8132 [R <sub>int</sub> = 0.0378]                                                 | 6447 [R <sub>int</sub> = 0.0345]                                                 |
| Completeness to theta = 25.242°                   | 100.0 %                                      | 100.0 %                                                                          | 100.0 %                                                                          |
| Absorption correction                             | Semi-empirical from equivalents              | Semi-empirical from equivalents                                                  | Semi-empirical from equivalents                                                  |
| Max. and min. transmission                        | 0.7461 and 0.4511                            | 0.7461 and 0.4489                                                                | 0.7461 and 0.4737                                                                |
| Refinement method                                 | Full-matrix least-squares on F <sup>2</sup>  | Full-matrix least-squares on F <sup>2</sup>                                      | Full-matrix least-squares on F <sup>2</sup>                                      |
| Data / restraints / parameters                    | 5630 / 0 / 238                               | 8132 / 84 / 428                                                                  | 6447 / 0 / 384                                                                   |
| Goodness-of-fit on F <sup>2</sup>                 | 1.202                                        | 1.020                                                                            | 1.105                                                                            |
| Final R indices [I > 2σ(I)]                       | R1 = 0.0134<br>wR2 = 0.0323                  | R1 = 0.0247<br>wR2 = 0.0509                                                      | R1 = 0.0190<br>wR2 = 0.0384                                                      |
| R indices (all data)                              | R1 = 0.0146<br>wR2 = 0.0327                  | R1 = 0.0341<br>wR2 = 0.0533                                                      | R1 = 0.0223<br>wR2 = 0.0394                                                      |
| Largest diff. peak and hole/ e.Å <sup>-3</sup>    | 0.505 and -1.040                             | 0.818 and -1.738                                                                 | 2.011 and -1.133                                                                 |

**Table S2.** Bond lengths [Å] and angles [°] for complexes **3a**, **4a** and **5a**

|                   | <b>3a</b>  | <b>4a</b>  | <b>5a</b> |
|-------------------|------------|------------|-----------|
| Os(1)-C(11)       | 2.0543(15) | 2.060(2)   | 2.055(2)  |
| Os(1)-N(1)        | 2.0946(14) | 2.093(2)   | 2.089(2)  |
| Os(1)-C(1)        | 2.1839(16) | 2.194(3)   | 2.212(2)  |
| Os(1)-C(2)        | 2.1615(17) | 2.252(3)   | 2.176(2)  |
| Os(1)-C(3)        | 2.1830(17) | 2.271(3)   | 2.204(2)  |
| Os(1)-C(4)        | 2.2279(17) | 2.215(3)   | 2.224(2)  |
| Os(1)-C(5)        | 2.2722(16) | 2.182(3)   | 2.266(2)  |
| Os(1)-C(6)        | 2.2655(16) | 2.166(2)   | 2.186(2)  |
| Os(1)-Cl(1)       | 2.4281(4)  |            |           |
| Os(1)-N(31)       |            | 2.117(2)   |           |
| Os(1)-N(23)       |            |            | 2.125(2)  |
| C(11)-Os(1)-N(1)  | 77.37(6)   | 77.36(9)   | 77.39(9)  |
| N(1)-Os(1)-C(1)   | 91.92(6)   | 93.10(10)  | 105.08(8) |
| N(1)-Os(1)-C(2)   | 116.09(6)  | 95.66(11)  | 138.13(9) |
| N(1)-Os(1)-C(3)   | 153.87(6)  | 120.74(13) | 172.30(9) |
| N(1)-Os(1)-C(4)   | 160.55(6)  | 157.23(12) | 139.24(8) |
| N(1)-Os(1)-C(5)   | 123.56(6)  | 157.24(10) | 107.38(8) |
| N(1)-Os(1)-C(6)   | 97.02(6)   | 118.92(9)  | 92.69(8)  |
| C(11)-Os(1)-Cl(1) | 86.61(4)   |            |           |
| N(1)-Os(1)-Cl(1)  | 85.26(4)   |            |           |
| C(1)-Os(1)-Cl(1)  | 153.76(4)  |            |           |
| C(2)-Os(1)-Cl(1)  | 158.18(5)  |            |           |
| C(3)-Os(1)-Cl(1)  | 119.82(5)  |            |           |
| C(4)-Os(1)-Cl(1)  | 93.16(5)   |            |           |
| C(5)-Os(1)-Cl(1)  | 93.01(4)   |            |           |
| C(6)-Os(1)-Cl(1)  | 116.74(4)  |            |           |
| N(31)-Os(1)-C(1)  |            | 157.54(9)  |           |
| N(31)-Os(1)-C(2)  |            | 120.02(9)  |           |
| N(31)-Os(1)-C(3)  |            | 94.24(9)   |           |
| N(31)-Os(1)-C(4)  |            | 91.15(9)   |           |
| N(31)-Os(1)-C(5)  |            | 116.34(10) |           |
| N(31)-Os(1)-C(6)  |            | 154.70(10) |           |
| C(11)-Os(1)-N(31) |            | 87.58(8)   |           |
| N(1)-Os(1)-N(31)  |            | 85.65(7)   |           |
| N(23)-Os(1)-C(1)  |            |            | 169.08(8) |
| N(23)-Os(1)-C(2)  |            |            | 136.31(9) |
| N(23)-Os(1)-C(3)  |            |            | 102.35(9) |
| N(23)-Os(1)-C(4)  |            |            | 88.16(8)  |
| N(23)-Os(1)-C(5)  |            |            | 103.57(8) |
| N(23)-Os(1)-C(6)  |            |            | 136.90(8) |
| N(1)-Os(1)-N(23)  |            |            | 83.57(8)  |
| C(11)-Os(1)-N(23) |            |            | 86.21(8)  |



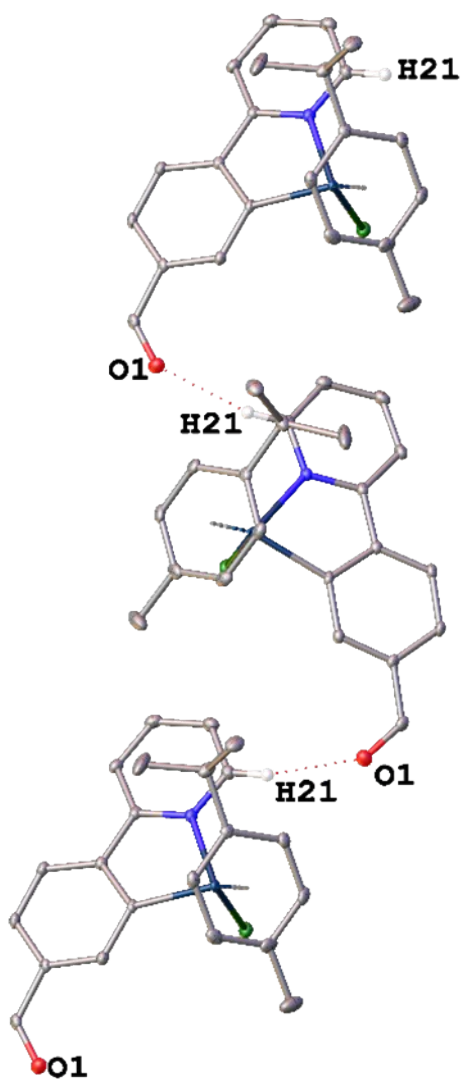

**Figure S46.** Schematic showing close contacts in complex **3a**.

**Table S3.** Close contacts for complex **3a** [ $\text{\AA}$  and  $^\circ$ ].

| D-H...A              | d(D-H) | d(H...A) | d(D...A) | $\angle(\text{DHA})$ |
|----------------------|--------|----------|----------|----------------------|
| C(21)-H(21)...O(1)#1 | 0.95   | 2.41     | 3.346(2) | 166.8                |

Symmetry transformations used to generate equivalent atoms: #1  $x+1/2, -y+3/2, z+1/2$

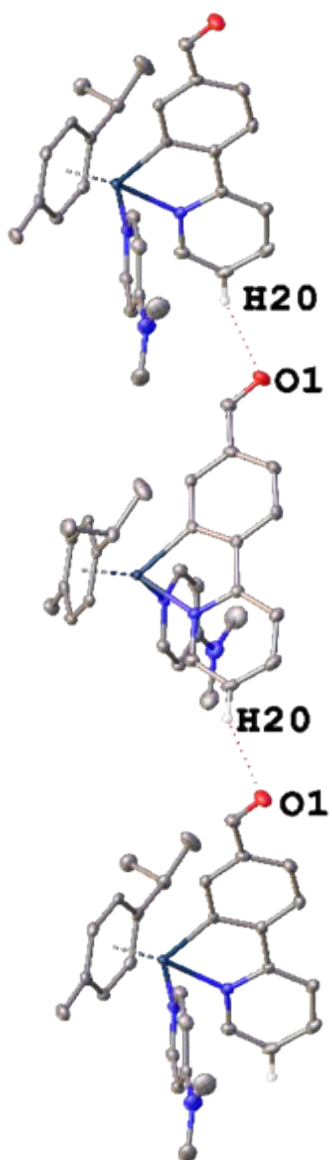

**Figure S47.** Schematic showing close contacts in complex **5a**.

**Table S4.** Close contacts for complex **5a** [Å and °].

| D-H...A              | d(D-H) | d(H...A) | d(D...A) | <(DHA) |
|----------------------|--------|----------|----------|--------|
| C(20)-H(20)...O(1)#1 | 0.95   | 2.47     | 3.309(3) | 147.9  |

Symmetry transformations used to generate equivalent atoms: #1  $x+1/2, -y+3/2, z+1/2$

## 10. Morphological analysis of A2780 cells

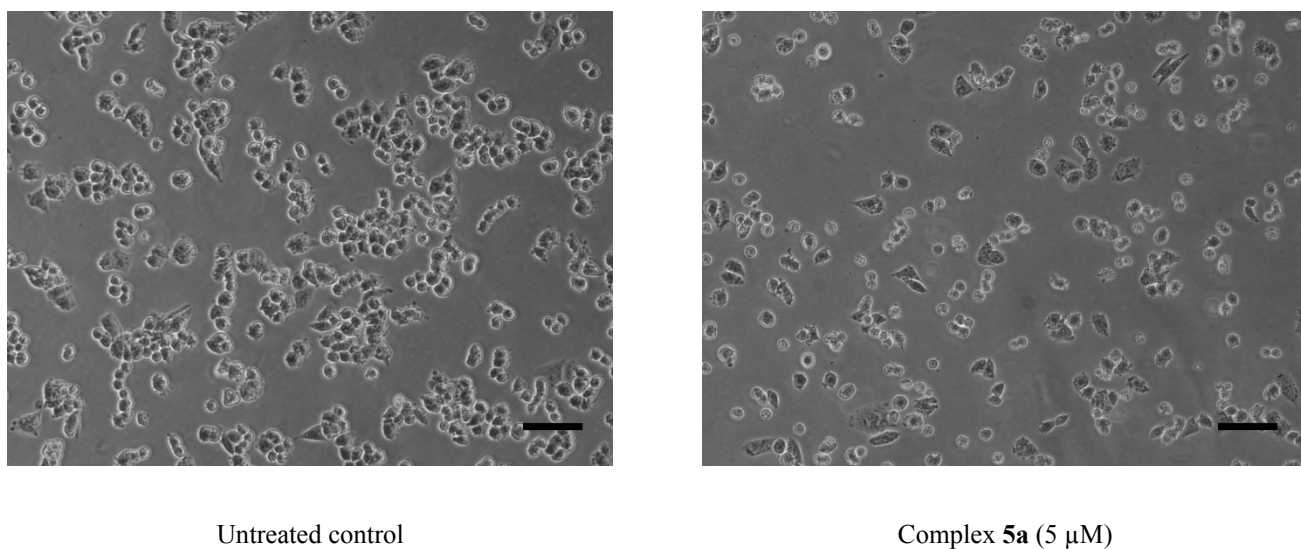

**Figure S48.** Cellular morphology of A2780 cells upon 24 h treatment with complex **5a** visualized under phase contrast NIKON Eclipse TE 2000U microscope. Scale bar = 100  $\mu$ m.

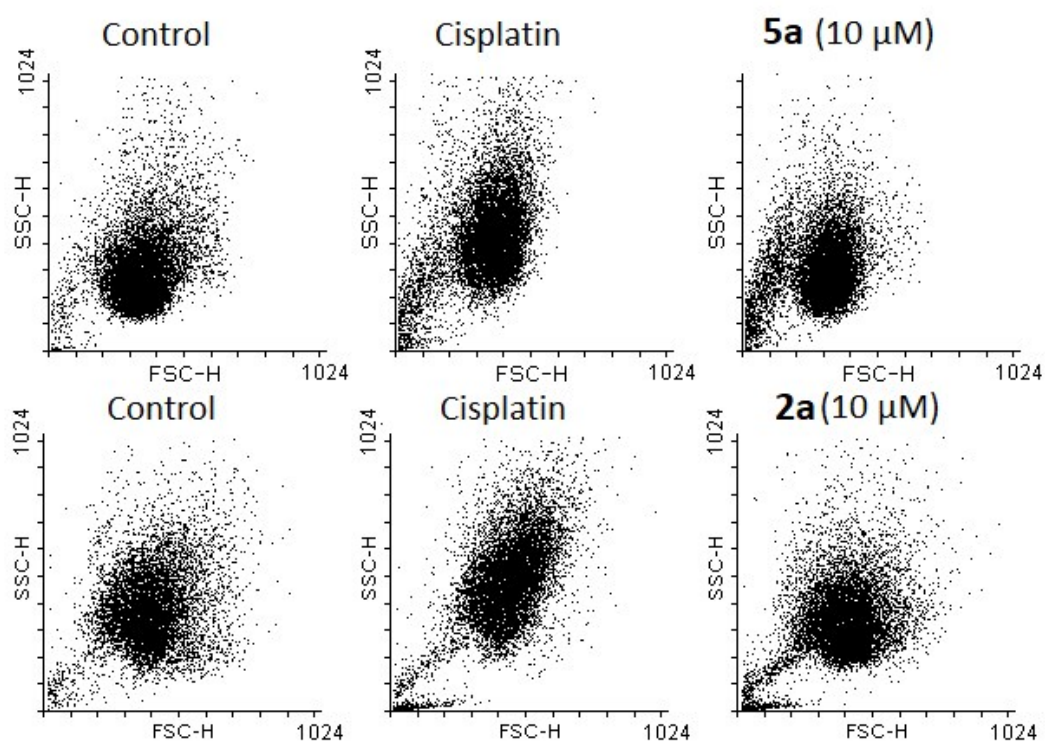

**Figure S49.** Effect of complexes **2a** and **5a** in the morphological analysis of A2780 evaluated by flow cytometry after 24 h treatment. Cisplatin (10  $\mu$ M) was used as positive control. FSC-H: forward scatter, SSC-H: side scatter.

## 11. Measurement of the mitochondrial membrane potential.

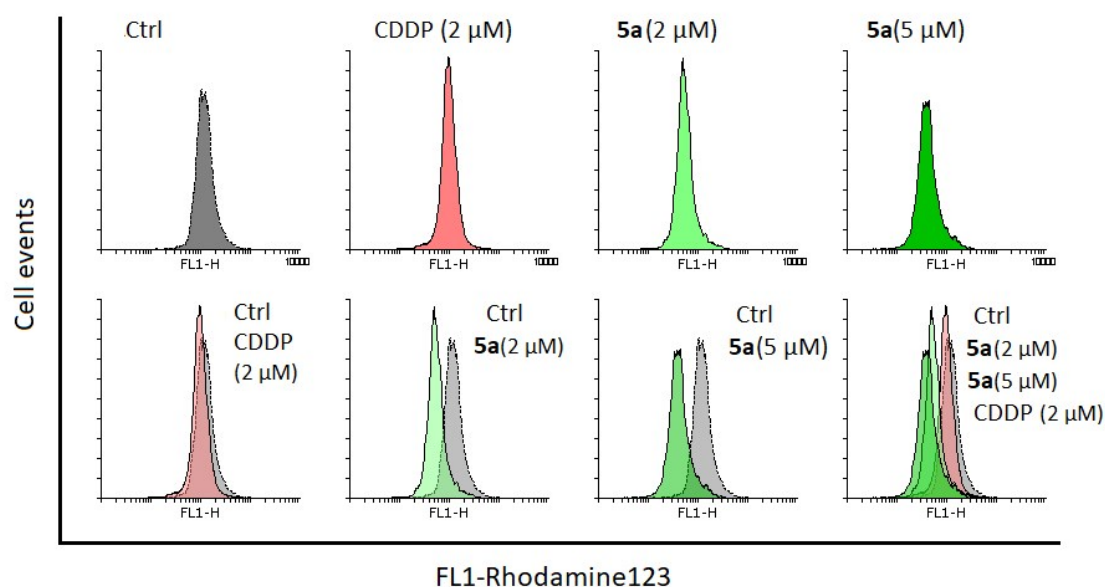

**Figure S50.** Impact on A2780 mitochondrial membrane potential evaluated by flow cytometry using Rhodamine123 dye in the FL1 channel after 24 h treatment with complex 5a or cisplatin.

## 12. Cell death induction assays.

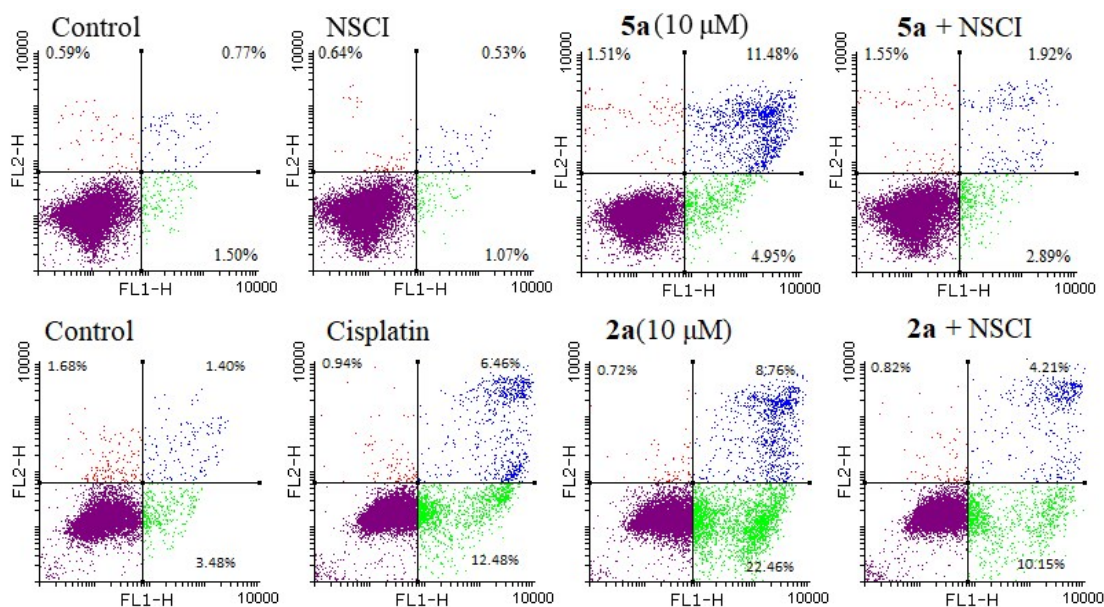

**Figure S51.** Representative flow cytometry dot plots of dual AnnexinV(FL1-H)/Propidium iodide (FL2-H) staining for apoptosis/necrosis induction evaluation. Cells were treated for 24h with 2a, 5a alone or subsequent to pretreatment with caspase 3 inhibitor NSCI (5  $\mu$ M) for 1 h. Cisplatin (5  $\mu$ M) was used as a positive control.

### 13. Cell cycle analysis.

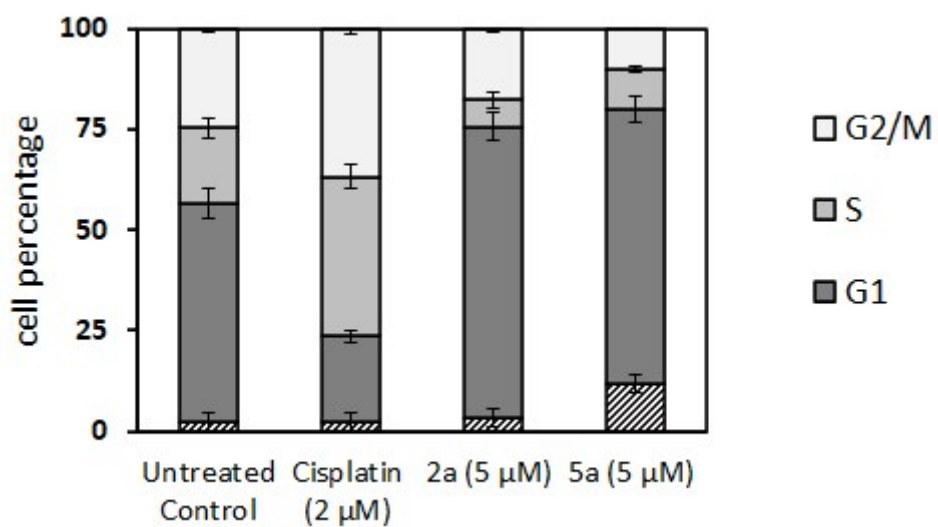

**Figure S52.** Cell cycle analysis of A2780 treated with either complex **2a**, **5a** or cisplatin at indicated concentrations for 24 h measured using Propidium iodide intensity by flow cytometry in the FL2-A channel (n=2 replicates).

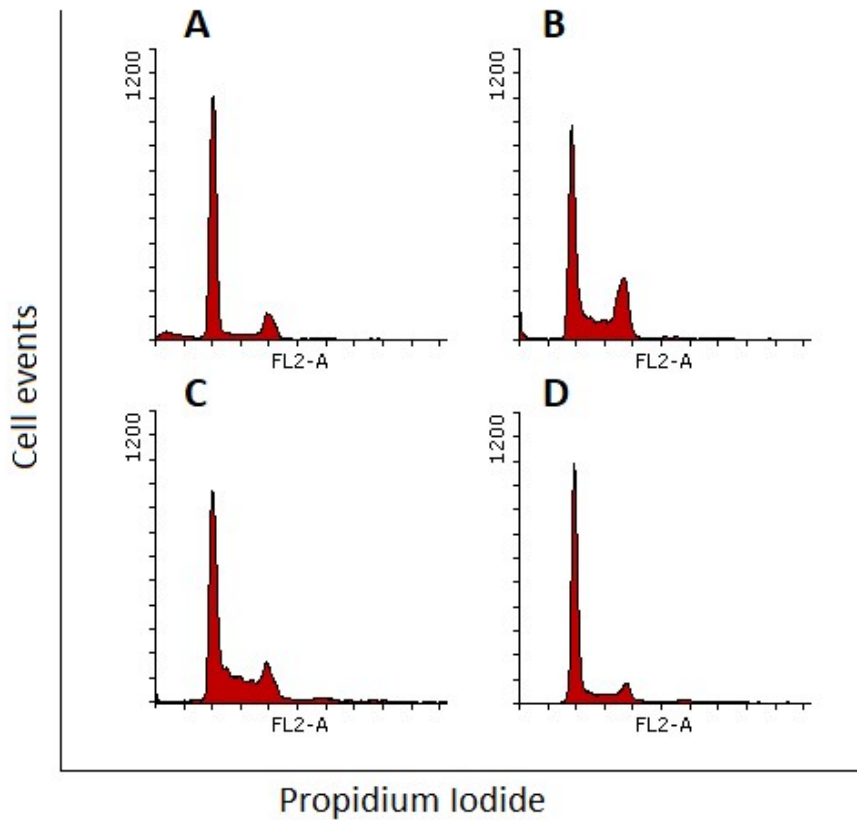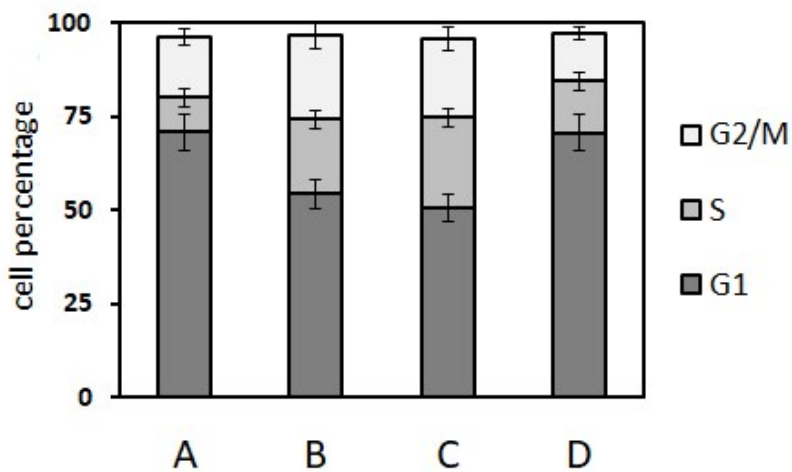

**Figure S53.** Cell cycle reversibility test in A2780 cells. Cells were synchronized by serum starvation to G1 phase during 24 h, treated with 2  $\mu$ M **5a** for either 6 or 24 h. After drug exposure period, cells were returned to serum-containing cell media for another 24 h to re-enter cell cycle progression. A) G1-enriched cells by serum starvation, B) G1-released cells, C) 6 h **5a**-treated cells, D) 24 h **5a**-treated cells. Propidium iodide intensity was measured by flow cytometry in the FL2-A channel.

#### 14. Protein synthesis inhibition assay

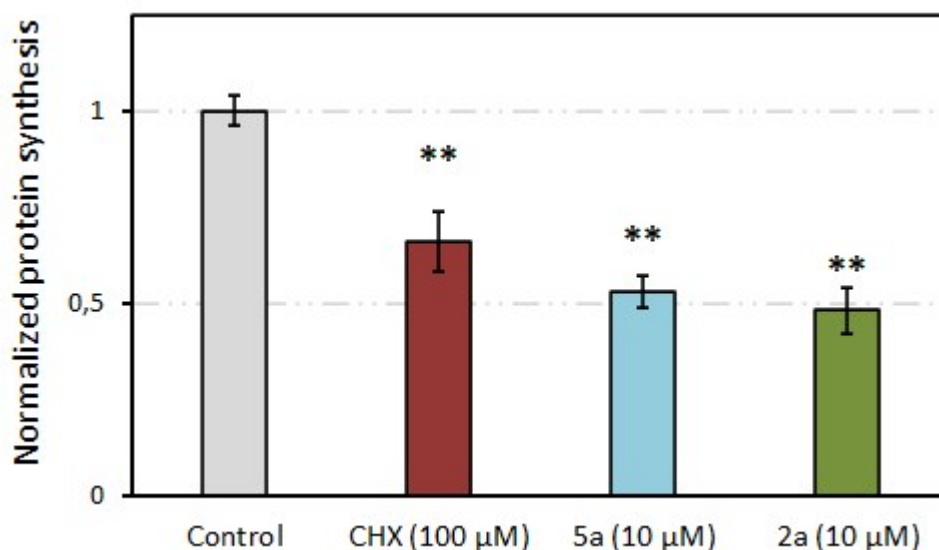

**Figure S54.** Normalized translation levels measured by O-propargyl-puromycin incorporation in nascent proteins using Click-iT Alexa Fluor-OPP Kit (Thermofisher) after treatment for 12 h with either **2a**, **5a** or cycloheximide (CHX), which was used as a positive control. Data are representative of two independent experiments and represented as mean  $\pm$  SD \*\* $p < 0.01$  (student t-test).

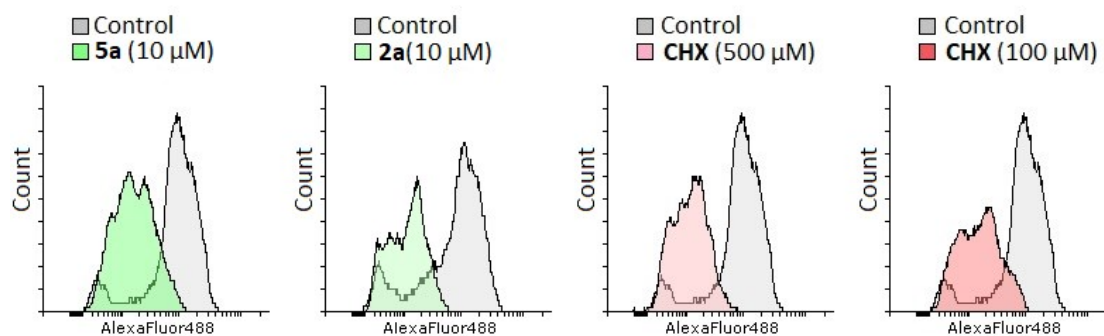

**Figure S55.** Flow cytometry analysis of O-propargyl-puromycin incorporation in nascent proteins using Click-iT Alexa Fluor-OPP Kit (Thermofisher). Fluorescence of AlexaFluor488 was measured in FL1-H channel after treatment for 12 h with either complex **2a**, **5a** or cycloheximide (CHX) as a positive control. Data are representative of two independent experiments.



## 15. ROS generation

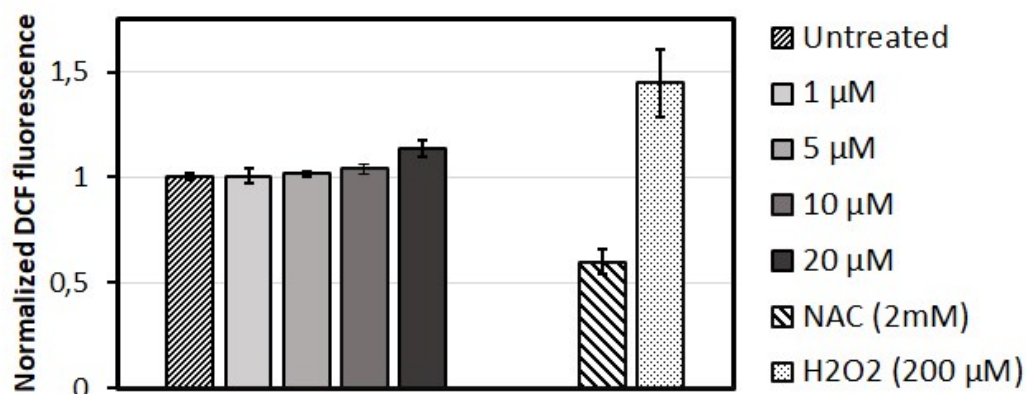

**Figure S56.** ROS levels in A2780 after 2 h exposure of complex **5a** at indicated concentrations measured using DCFH-DA probe. Untreated cells were used as a negative control, N-acetylcysteine (NAC) was used as a positive control for ROS scavenging and hydrogen peroxide ( $H_2O_2$ ), as a positive control for ROS generation.

## 16. Tumor size evaluation

The obtained bright-field images were used to measure the area of each tumorous gonad by using the ImageJ software<sup>1</sup>. Gonad sizes were measured from the loop region to the proximal region, including uterus area when it was filled with tumorous cells. Significance of the obtained data was performed by the ANOVA test with a significance level of 0.5.

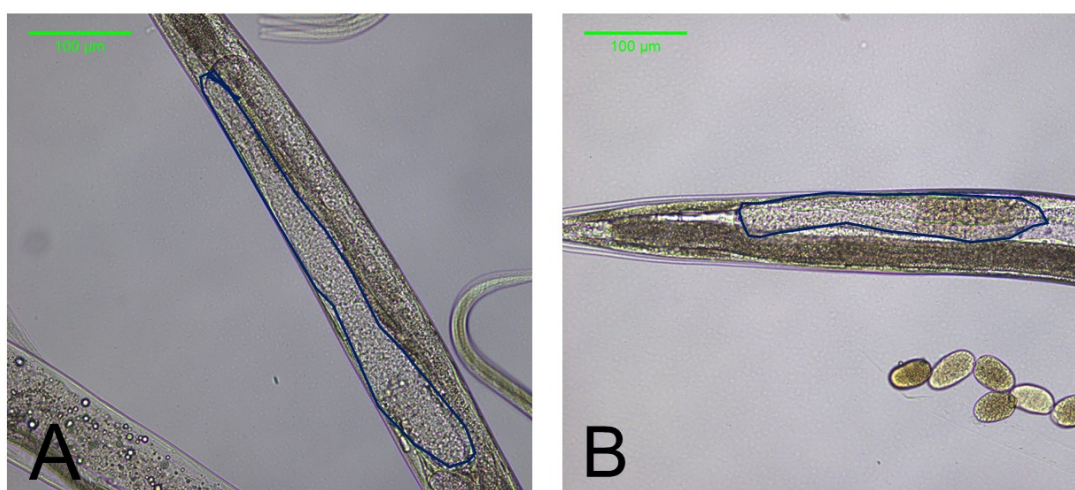



**Figure S57.** Effect on tumor growth of complex **5b**. Representative images taken at 20x of: (A) 0.1 % DMSO (control) treated animal, (B) 100  $\mu$ M complex **5b** in 0.1 % DMSO, in all the cases the tumor is outlined in blue. Scale bar: 100  $\mu$ m.

**Table S5:** Tumor size data.

|                   | <b>C</b><br><b>(<math>\mu\text{M}</math>)</b> | <b>n</b> | <b>Gonad Size</b><br><b>(<math>\mu\text{m}^2</math>)</b> | <b>S. D</b> | <b>Change</b><br><b>(%)</b> | <b><i>p</i> value vs</b><br><b>control</b> |
|-------------------|-----------------------------------------------|----------|----------------------------------------------------------|-------------|-----------------------------|--------------------------------------------|
| <b>CDDP</b>       | 0                                             | 39       | 14504.92                                                 | 3184.982    | 0.00                        |                                            |
|                   | 0.1                                           | 16       | 13129.62                                                 | 1611.226    | -9.48                       | 0.107553                                   |
|                   | 1                                             | 16       | 13265.06                                                 | 1891.873    | -8.55                       | 0.152728                                   |
|                   | 10                                            | 36       | 10435.45                                                 | 2128.697    | -28.06                      | <0.00001                                   |
|                   | 100                                           | 47       | 7408.581                                                 | 2149.854    | -48.92                      | <0.00001                                   |
| <b>Complex 5a</b> | 0                                             | 12       | 13339.67                                                 | 1618.312    | 0.00                        |                                            |
|                   | 0.1                                           | 20       | 12976.09                                                 | 2532.537    | -2.73                       | 0.660005                                   |
|                   | 1                                             | 18       | 12949.04                                                 | 2137.884    | -2.93                       | 0.613771                                   |
|                   | 10                                            | 18       | 11093.36                                                 | 1323.740    | -16.84                      | 0.000896                                   |
|                   | 100                                           | 34       | 10773.92                                                 | 1901.112    | -19.23                      | 0.000143                                   |
| <b>Complex 5b</b> | 0                                             | 39       | 14581.19                                                 | 1957.911    | 0.00                        |                                            |
|                   | 0.1                                           | 20       | 14687.63                                                 | 1737.061    | 0.73                        | 0.840867                                   |
|                   | 1                                             | 20       | 14606.76                                                 | 1373.826    | 0.18                        | 0.960106                                   |
|                   | 10                                            | 21       | 12989.33                                                 | 1836.192    | -10.92                      | 0.00378                                    |
|                   | 100                                           | 53       | 10119.56                                                 | 2554.976    | -30.60                      | <0.00001                                   |
| <b>Complex 2a</b> | 0                                             | 73       | 16552.92                                                 | 2856.43     | 0.00                        |                                            |
|                   | 0.1                                           | 58       | 14139.82                                                 | 2379.38     | -14.58                      | <0.00001                                   |
|                   | 1                                             | 59       | 11217.88                                                 | 2101.39     | -32.23                      | <0.00001                                   |
|                   | 10                                            | 57       | 13493.89                                                 | 2232.82     | -18.48                      | <0.00001                                   |
|                   | 100                                           | 74       | 13445.74                                                 | 2342.75     | -18.77                      | <0.00001                                   |



## 17. Survival assays

**Table S6:** Lifespan assays survival data.

|                         |            | C ( $\mu$ M) | n   | days  | S. E | Change in Lifespan (%) | p value vs control |
|-------------------------|------------|--------------|-----|-------|------|------------------------|--------------------|
| JK1466 ( <i>gld-1</i> ) | CDDP       | 0            | 74  | 8.32  | 0.2  | 0.00                   |                    |
|                         |            | 0.1          | 42  | 8.7   | 0.23 | 4.57                   | 0.5218             |
|                         |            | 1            | 60  | 8.42  | 0.21 | 1.20                   | 0.9642             |
|                         |            | 10           | 53  | 9.77  | 0.21 | <b>17.43</b>           | 0.0001             |
|                         |            | 100          | 46  | 9.82  | 0.17 | <b>18.03</b>           | 0.0008             |
|                         | Complex 5a | 0            | 46  | 8.33  | 0.25 | 0.00                   |                    |
|                         |            | 0.1          | 44  | 8.15  | 0.28 | -2.16                  | 0.9029             |
|                         |            | 1            | 44  | 9.4   | 0.24 | <b>12.85</b>           | 0.0328             |
|                         |            | 10           | 31  | 9.74  | 0.32 | <b>16.93</b>           | 0.0005             |
|                         |            | 100          | 40  | 8.87  | 0.5  | 6.48                   | 0.019              |
|                         | Complex 5b | 0            | 115 | 8.46  | 0.18 | 0.00                   |                    |
|                         |            | 0.1          | 96  | 8.68  | 0.2  | 2.60                   | 0.2929             |
|                         |            | 1            | 100 | 8.95  | 0.18 | <b>5.79</b>            | 0.0429             |
|                         |            | 10           | 127 | 9.12  | 0.14 | <b>7.80</b>            | 0.0403             |
|                         |            | 100          | 101 | 9.45  | 0.14 | <b>11.70</b>           | 0.0002             |
|                         | Complex 2a | 0            | 184 | 8.6   | 0.18 | 0.00                   |                    |
|                         |            | 0.1          | 168 | 8.63  | 0.15 | 0.35                   | 0.4436             |
|                         |            | 1            | 116 | 9.14  | 0.2  | <b>6.28</b>            | 0.0327             |
|                         |            | 10           | 124 | 9.31  | 0.19 | <b>8.26</b>            | 0.0001             |
|                         |            | 100          | 92  | 9.31  | 0.31 | <b>8.26</b>            | 0.0512             |
| N2 (Wild-type)          | CDDP       | 0            | 136 | 10.76 | 0.1  | 0.00                   |                    |
|                         |            | 0.1          | 52  | 10.65 | 0.11 | -1.02                  | 0.2366             |
|                         |            | 1            | 133 | 10.28 | 0.09 | -4.46                  | 0.002              |
|                         |            | 10           | 98  | 12.5  | 0.17 | <b>16.17</b>           | 0                  |
|                         |            | 100          | 81  | 12.04 | 0.15 | <b>11.90</b>           | 0                  |
|                         | Complex 5a | 0            | 167 | 9.65  | 0.06 | 0.00                   |                    |
|                         |            | 0.1          | 134 | 9.08  | 0.11 | -5.91                  | 0.0008             |
|                         |            | 1            | 151 | 10.04 | 0.1  | 4.04                   | 0.0001             |
|                         |            | 10           | 66  | 11.17 | 0.18 | <b>15.75</b>           | 0                  |
|                         |            | 100          | 55  | 11.24 | 0.24 | <b>16.48</b>           | 0                  |
|                         | Complex 5b | 0            | 192 | 10.82 | 0.27 | 0.00                   |                    |
|                         |            | 0.1          | 178 | 11.09 | 0.31 | 2.50                   | 0.8308             |
|                         |            | 1            | 140 | 11.25 | 0.22 | 3.97                   | 0.2302             |
|                         |            | 10           | 114 | 11.3  | 0.22 | <b>4.44</b>            | 0.0261             |
|                         |            | 100          | 188 | 11.23 | 0.25 | 3.79                   | 0.7807             |
|                         | Complex 2a | 0            | 128 | 11.05 | 0.11 | 0.00                   |                    |
|                         |            | 0.1          | 72  | 12.1  | 0.13 | 9.50                   | 0.000003           |

|  |  |     |     |       |      |              |           |
|--|--|-----|-----|-------|------|--------------|-----------|
|  |  | 1   | 118 | 12.54 | 0.17 | <b>13.48</b> | 0.0000001 |
|  |  | 10  | 72  | 10.5  | 0.12 | -4.98        | 0.003     |
|  |  | 100 | 133 | 10.28 | 0.09 | -6.97        | 0.0000037 |

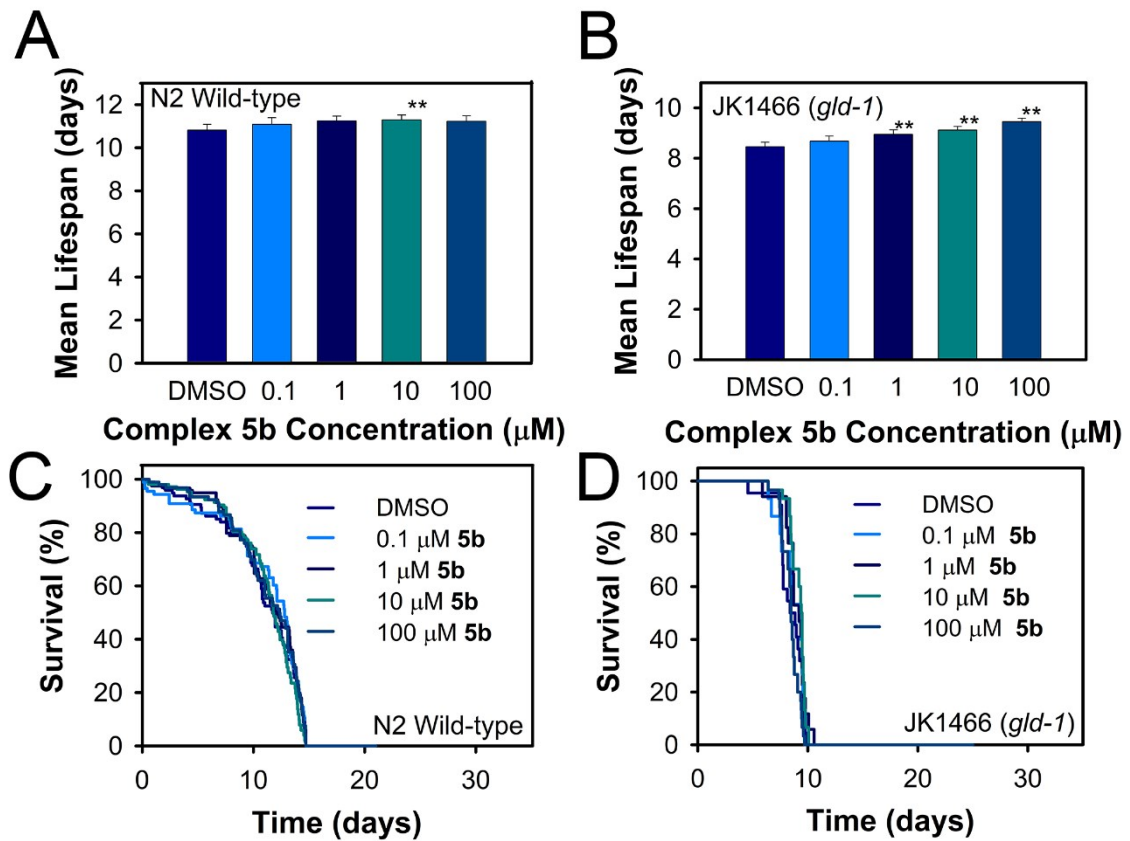

**Figure S58.** Toxicity effect of complex **5b**. Lifespan histograms and survival curves for the strains N2 and JK1466 treated with different concentrations of **5b**. Data is presented as mean  $\pm$  SE, \*\* significant at  $p \leq 0.05$

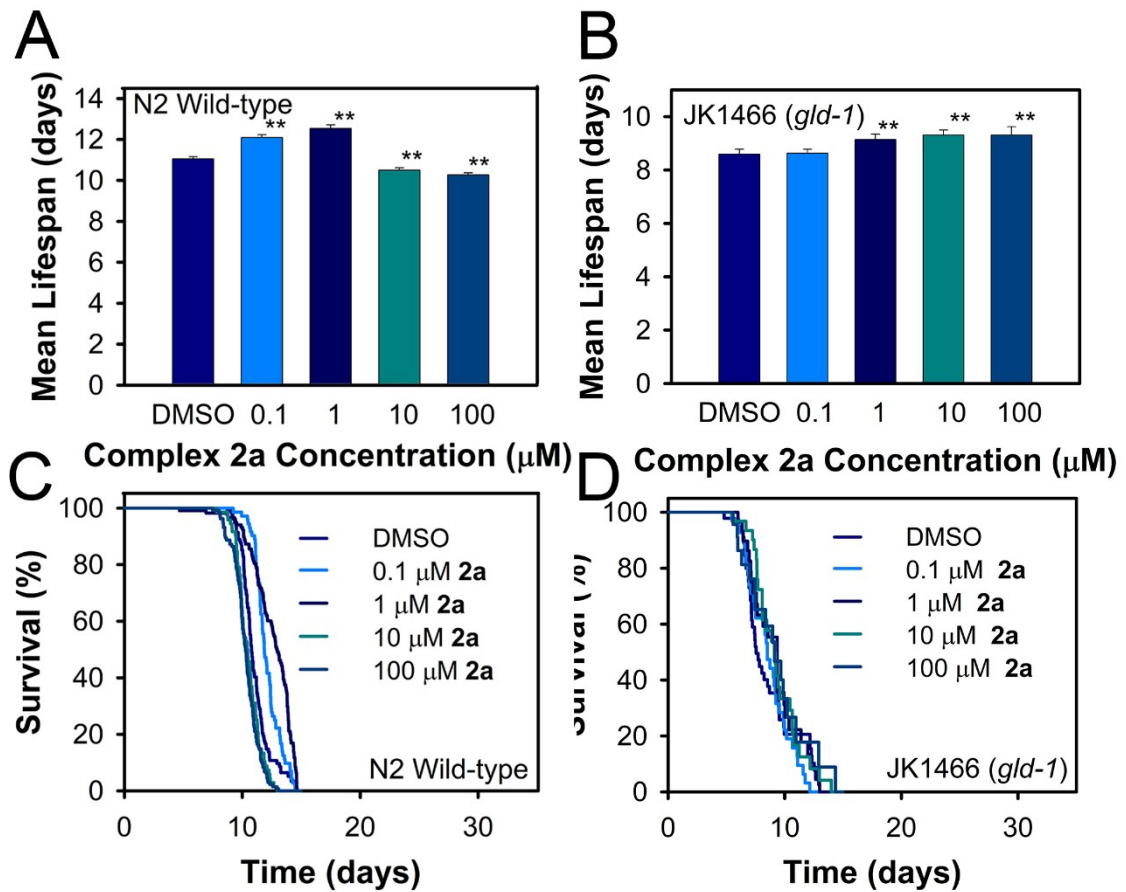

**Figure S59.** Toxicity effect of complex **2a**. Lifespan histograms and survival curves for the strains N2 and JK1466 treated with different concentrations of **2a**. Data is presented as mean  $\pm$  SE, \*\* significant at  $p \leq 0.05$

## 18. Effect of the metallic complexes in ROS production *in vivo*

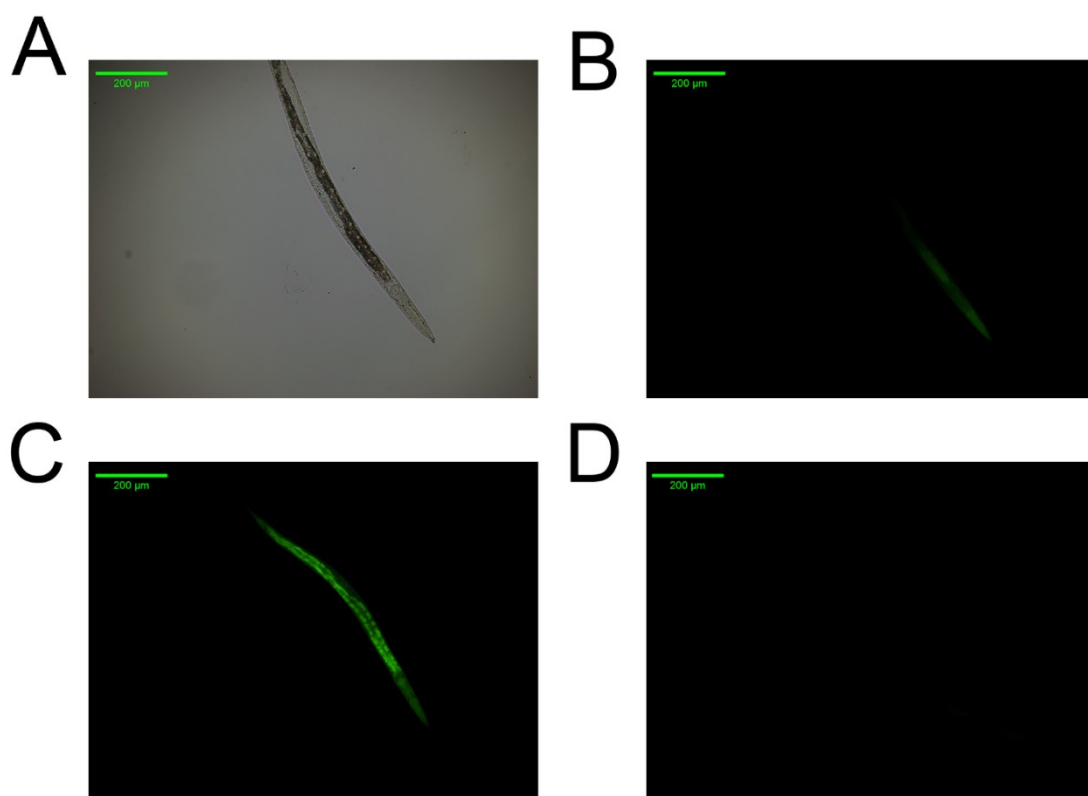

**Figure S60.** Effect of the metal complexes in ROS production. Representative images of: (A) *C. elegans* wild-type bright-field, (B) Positive control (treated with juglone), (C) Animals treated with 100 μM CDDP, (D) Worms treated with 100 μM **5a**. scale bar: 200 μm.

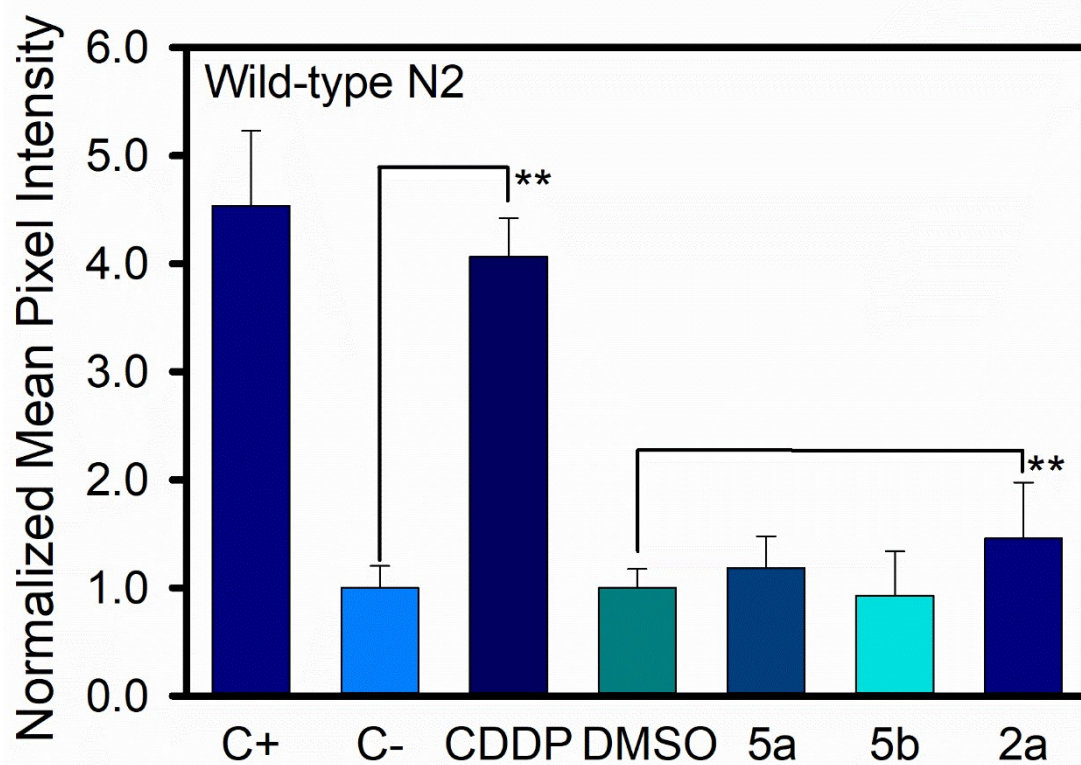

**Figure S61.** Metallic complexes effect in ROS production *in vivo*. Integrated fluorescence of the *C. elegans* wild-type, treated with the metal complexes (100  $\mu$ M) or juglone (20  $\mu$ M) and stained with DCFH-DA (MEAN  $\pm$  SEM),  $n \geq 10$ , two independent trials were measured in each case, \*\*  $p \leq 0.05$  by ANOVA test.



## 19. Effect of 4a, 4b and CDDP on HSP-16.2p expression

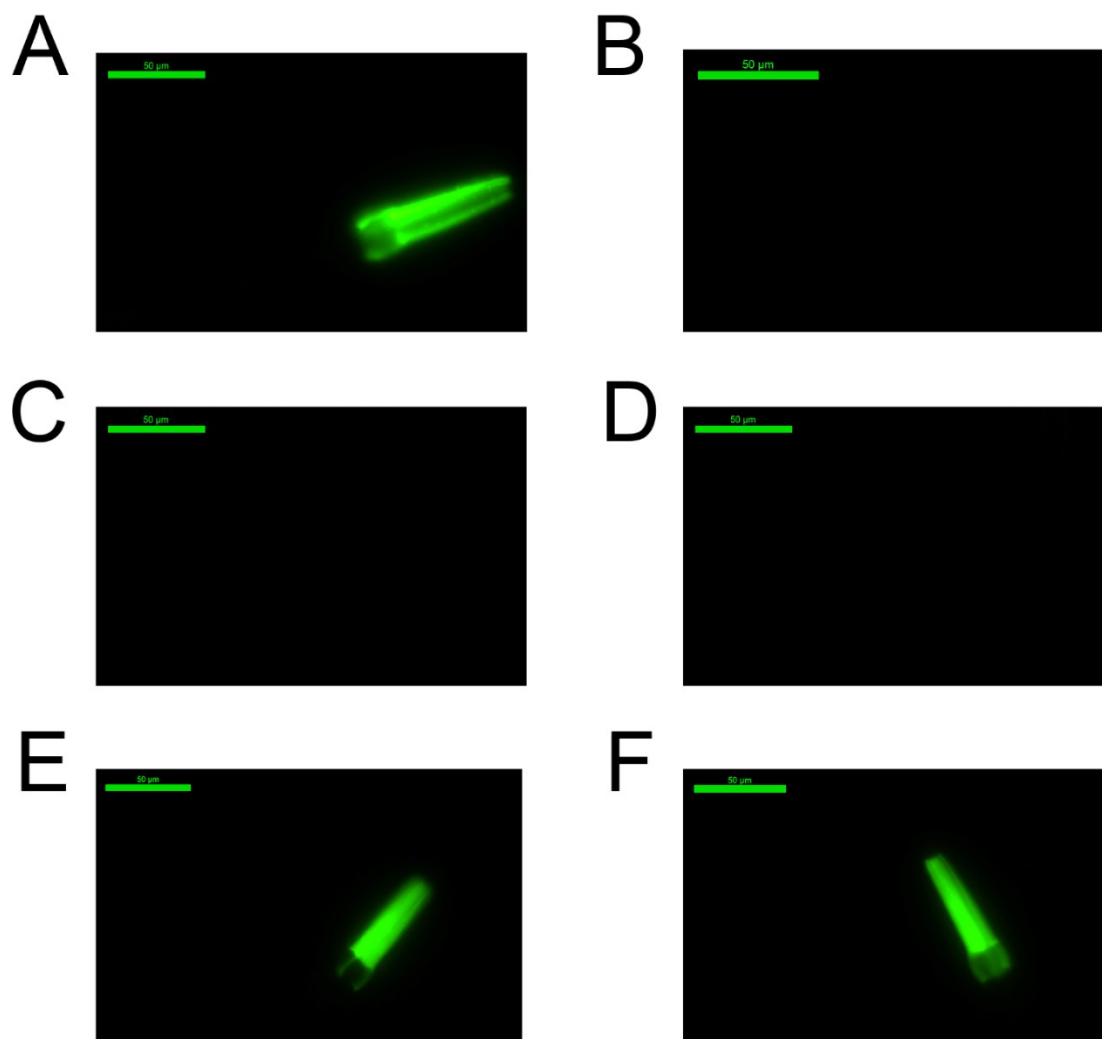

**Figure S62.** Effect of the metal complexes in oxidative stress resistance. Representative images of: (A) Positive control (treated with juglone), (B) Control negative, (C) Animals treated with 100  $\mu$ M CDDP, (D) Worms treated with 100  $\mu$ M complex **5a**, (E) Animals treated with 100  $\mu$ M CDDP (48 h) and 20  $\mu$ M juglone (24 h) and (F) Animals treated with 100  $\mu$ M complex **5a** (48 h) and 20  $\mu$ M juglone (24 h). scale bar: 50  $\mu$ m.

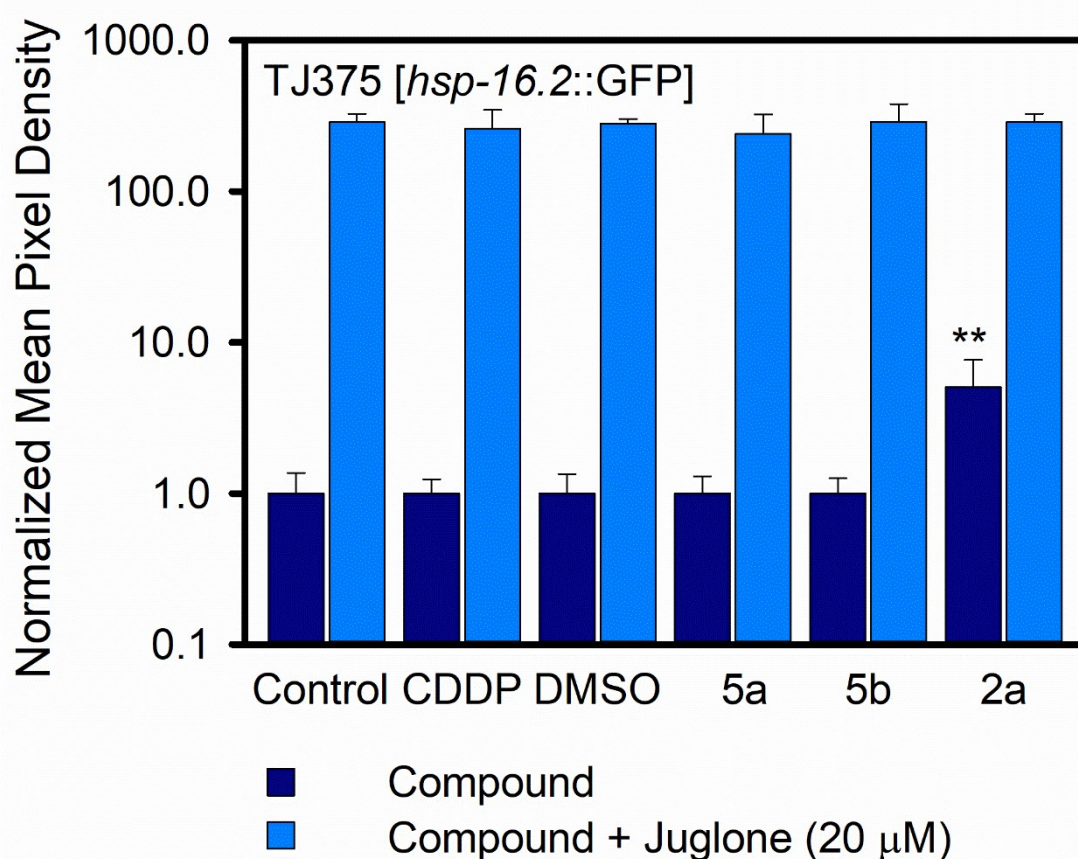

**Figure S63.** Effect of the metal complexes in HSP-16.2::GFP expression. Integrated fluorescence of the TJ375 *C. elegans* strain, treated with the metal complexes (100 μM) with or without juglone (20 μM) (MEAN ± SEM), n ≥ 10, two independent trials were measured in each case, the results were not significant by ANOVA test.

## 20. Effect of 5a, 5b and CDDP on SOD-3 expression

Synchronous cohorts of the CF1553 strain were treated with 100 μM of each drug or their vehicle for 48 hours at 20 °C in S medium, juglone 20 μM was used as positive control. Then worms were washed with M9 and visualized under fluorescence microscope at 20x lens with the I3 filter cube. The image acquisition and analysis were performed as above. Whereas the SOD-3 is accumulated in the head, the tail and the vulva of the animals, only the head fluorescence was used to measure the SOD-3 accumulation.

## 21. Effect of 4a, 4b and CDDP on GST-4p expression

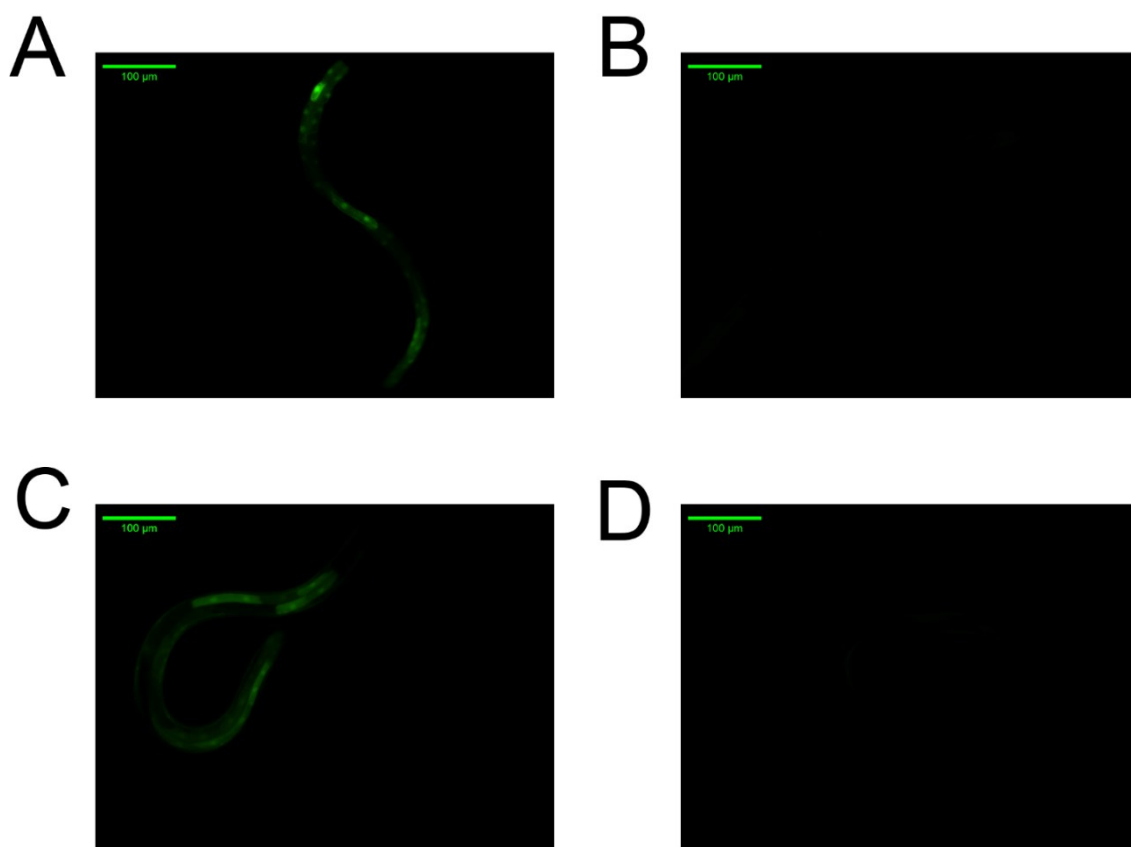

**Figure S64.** Effect of the metal complexes in GST-4 expression. Representative images of: (A) Positive control (CL2166 strain treated with juglone), (B) Control negative, (C) Animals treated with 100  $\mu$ M CDDP, (D) Worms treated with 100  $\mu$ M complex **5a**. Scale bar: 100  $\mu$ m.

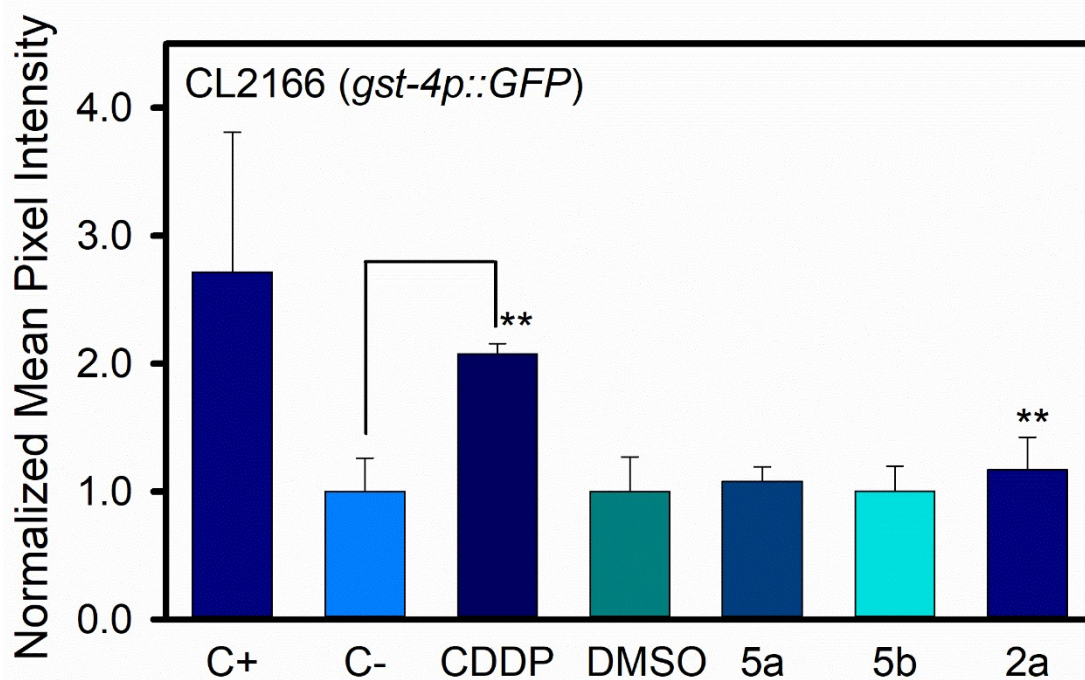

**Figure S65.** Effect of the metal complexes in GST-4::GFP expression. Integrated fluorescence of the CL2166 *C. elegans* strain, treated with the metal complexes (100  $\mu$ M) or with juglone (20  $\mu$ M) (MEAN  $\pm$  SEM),  $n \geq 10$ , two independent trials were measured in each case, \*\*\* significant at  $p \leq 0.05$  by ANOVA test.

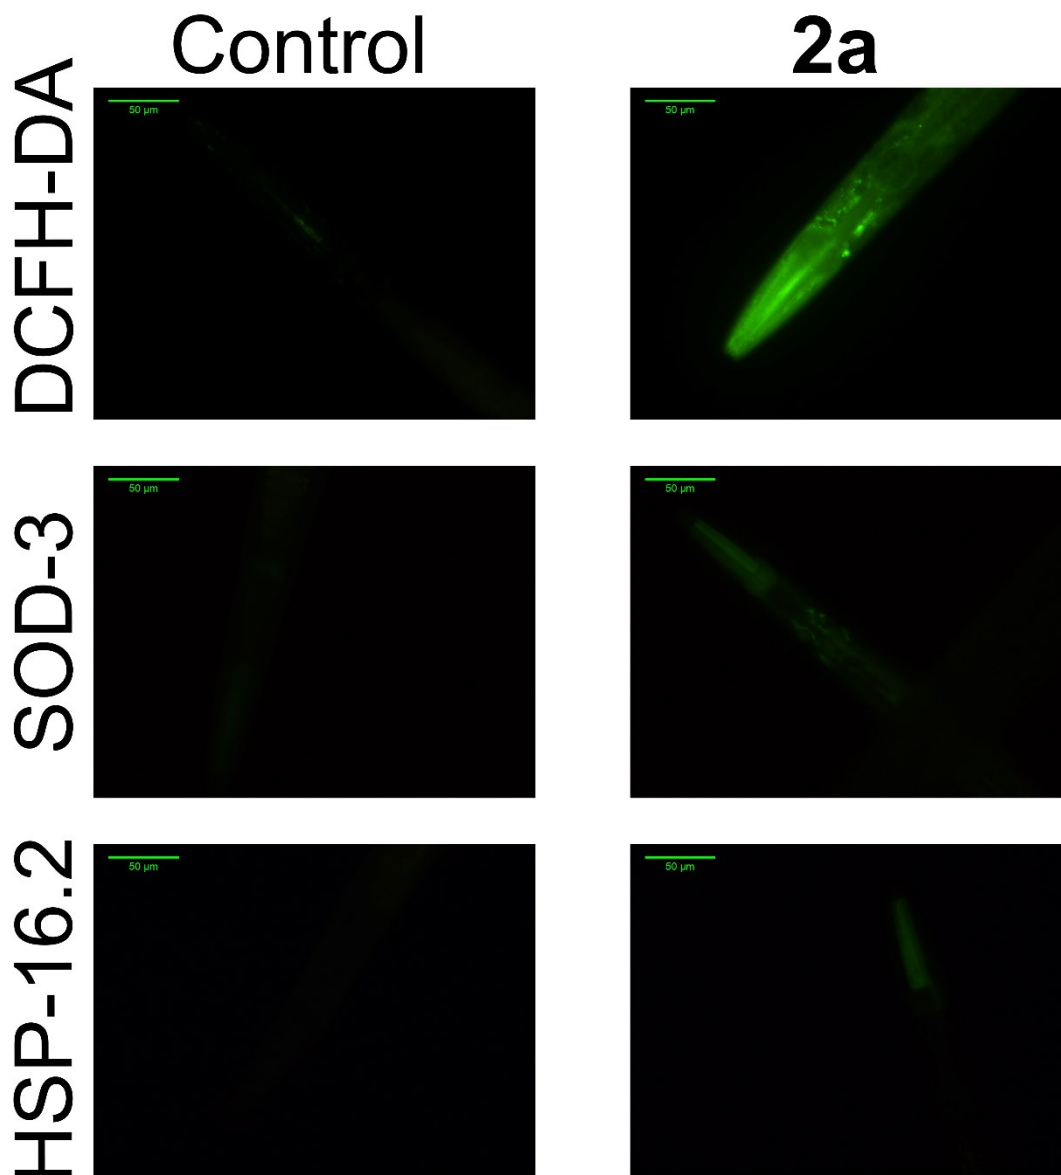

**Figure S66.** Effect of the complex **2a** on ROS production, SOD-3 and HSP-16.2 expression. Representative images of N2 stained with DCFH-DA, CF1553 strain and TJ375 strain treated either with DMSO (control) or with 100  $\mu$ M of complex **2a**. Scale bar: 50  $\mu$ m.

## 22. References

- 1 C. A. Schneider, W. S. Rasband and K. W. Eliceiri, *Nature Methods*, 2012, **9**, 671–675.
